# Supplementary material for: Use of different dry materials to control the moisture in a black soldier fly (Hermetia illucens) rearing substrate
Source: PeerJ. 2024 Mar 28;12:e17129. doi: 10.7717/peerj.17129 (PMC10981887; doi:10.7717/peerj.17129)
Supplement: Supplemental Information 1 — The larvae grew in media with various dry substrate additions. [file peerj-12-17129-s001.xlsx]

## Sheet: Larval duration_small scale 
Small-scale trial 1							Small-scale trial 2
Dry Substrate List		Larval duration (d)	Replication	Dry Substrate type			Dry Substrate List		Larval duration (d)	Replication	Dry Substrate type
1 = CON		9	1	1			1 = CON		13	1	1
2 = 25% rice husk (25%RH)		9	1	1			2 = 5% rice husk (5%RH)		13	1	1
3 = 50% rice husk (50%RH)		9	1	1			3 = 10% rice husk (10%RH)		13	1	1
4 = 25% rice husk ash (25%RHA)		9	1	1			4 = 15% rice husk (15%RH)		13	1	1
5 = 50% rice husk ash (50%RHA)		9	1	1			5 = 5% rice husk ash (5%RHA)		13	1	1
6 = 25% rubberwood sawdust (25%RSD)		9	1	1			6 = 10% rice husk ash (10%RHA)		13	1	1
7 = 50% rubberwood sawdust (50%RSD)		9	1	1			7 = 15% rice husk ash (15%RHA)		13	1	1
8 = 25% rice bran (25%RB)		9	1	1			8 = 5% rubberwood sawdust (5%RSD)		13	1	1
9 = 50% rice bran (50%RB)		9	1	1			9 = 10% rubberwood sawdust (10%RSD)		13	1	1
10 = 25% spent coffee ground (25%SCG)		9	1	1			10 = 15% rubberwood sawdust (15%RSD)		13	1	1
11 = 50% spent coffee ground (50%SCG)		9	1	1			11 = 5% rice bran (5%RB)		13	1	1
12 = 25% coconut coir (25%CC)		9	1	1			12 = 10% rice bran (10%RB)		13	1	1
13 = 50% coconut coir (50%CC)		9	1	1			13 = 15% rice bran (15%RB)		13	1	1
		9	1	1			14 = 5% spent coffee ground (5%SCG)		14	1	1
		9	1	1			15 = 10% spent coffee ground (10%SCG)		14	1	1
		9	1	1			16 = 15% spent coffee ground (15%SCG)		14	1	1
		9	1	1			17 = 5% coconut coir (5%CC)		14	1	1
		9	1	1			18 = 10% coconut coir (10%CC)		14	1	1
		9	1	1			19 = 15% coconut coir (15%CC)		14	1	1
		9	1	1					14	1	1
		9	1	1					14	1	1
		10	1	1					14	1	1
		10	1	1					14	1	1
		10	1	1					14	1	1
		10	1	1					14	1	1
		10	1	1					14	1	1
		10	1	1					14	1	1
		10	1	1					14	1	1
		10	1	1					14	1	1
		10	1	1					14	1	1
		10	1	1					14	1	1
		10	1	1					14	1	1
		10	1	1					14	1	1
		10	1	1					14	1	1
		10	1	1					14	1	1
		10	1	1					14	1	1
		10	1	1					14	1	1
		10	1	1					14	1	1
		10	1	1					14	1	1
		10	1	1					14	1	1
		10	1	1					14	1	1
		10	1	1					14	1	1
		10	1	1					14	1	1
		10	1	1					15	1	1
		10	1	1					15	1	1
		10	1	1					15	1	1
		10	1	1					15	1	1
		10	1	1					15	1	1
		10	1	1					15	1	1
		10	1	1					15	1	1
		10	1	1					15	1	1
		10	1	1					15	1	1
		10	1	1					15	1	1
		10	1	1					15	1	1
		10	1	1					15	1	1
		10	1	1					15	1	1
		10	1	1					15	1	1
		10	1	1					15	1	1
		10	1	1					15	1	1
		10	1	1					15	1	1
		10	1	1					15	1	1
		10	1	1					15	1	1
		10	1	1					15	1	1
		10	1	1					15	1	1
		10	1	1					15	1	1
		10	1	1					15	1	1
		10	1	1					15	1	1
		10	1	1					15	1	1
		10	1	1					15	1	1
		10	1	1					15	1	1
		10	1	1					15	1	1
		10	1	1					15	1	1
		10	1	1					15	1	1
		10	1	1					15	1	1
		10	1	1					15	1	1
		11	1	1					15	1	1
		11	1	1					15	1	1
		11	1	1					15	1	1
		11	1	1					15	1	1
		11	1	1					15	1	1
		11	1	1					15	1	1
		11	1	1					17	1	1
		11	1	1					17	1	1
		11	1	1					17	1	1
		11	1	1					17	1	1
		11	1	1					17	1	1
		11	1	1					17	1	1
		11	1	1					17	1	1
		11	1	1					17	1	1
		11	1	1					17	1	1
		11	1	1					17	1	1
		11	1	1					17	1	1
		11	1	1					17	1	1
		11	1	1					17	1	1
		11	1	1					17	1	1
		11	1	1					17	1	1
		11	1	1					17	1	1
		11	1	1					17	1	1
		11	1	1					17	1	1
		11	1	1					17	1	1
		11	1	1					17	1	1
		11	1	1					17	1	1
		11	1	1					17	1	1
		12	1	1					17	1	1
		12	1	1					17	1	1
		12	1	1					17	1	1
		12	1	1					17	1	1
		12	1	1					17	1	1
		12	1	1					17	1	1
		12	1	1					17	1	1
		12	1	1					17	1	1
		12	1	1					17	1	1
		12	1	1					17	1	1
		12	1	1					17	1	1
		12	1	1					17	1	1
		12	1	1					17	1	1
		12	1	1					17	1	1
		12	1	1					17	1	1
		12	1	1					17	1	1
		12	1	1					17	1	1
		12	1	1					17	1	1
		12	1	1					17	1	1
		12	1	1					17	1	1
		12	1	1					17	1	1
		13	1	1					17	1	1
		13	1	1					17	1	1
		13	1	1					17	1	1
		13	1	1					17	1	1
		13	1	1					17	1	1
		13	1	1					17	1	1
		13	1	1					17	1	1
		13	1	1					17	1	1
		13	1	1					17	1	1
		13	1	1					17	1	1
		13	1	1					17	1	1
		13	1	1					17	1	1
		14	1	1					17	1	1
		14	1	1					17	1	1
		14	1	1					17	1	1
		14	1	1					17	1	1
		14	1	1					17	1	1
		14	1	1					17	1	1
		14	1	1					17	1	1
		14	1	1					17	1	1
		14	1	1					17	1	1
		14	1	1					17	1	1
		14	1	1					17	1	1
		14	1	1					17	1	1
		14	1	1					17	1	1
		14	1	1					17	1	1
		14	1	1					17	1	1
		14	1	1					17	1	1
		14	1	1					17	1	1
		14	1	1					17	1	1
		14	1	1					17	1	1
		14	1	1					17	1	1
		14	1	1					17	1	1
		14	1	1					17	1	1
		14	1	1					17	1	1
		14	1	1					17	1	1
		14	1	1					17	1	1
		14	1	1					17	1	1
		14	1	1					17	1	1
		14	1	1					17	1	1
		14	1	1					17	1	1
		14	1	1					17	1	1
		14	1	1					17	1	1
		14	1	1					17	1	1
		14	1	1					17	1	1
		14	1	1					17	1	1
		14	1	1					17	1	1
		14	1	1					17	1	1
		14	1	1					17	1	1
		14	1	1					17	1	1
		14	1	1					17	1	1
		14	1	1					17	1	1
		14	1	1					18	1	1
		14	1	1					18	1	1
		14	1	1					18	1	1
		14	1	1					18	1	1
		14	1	1					18	1	1
		14	1	1					18	1	1
		14	1	1					18	1	1
		14	1	1					18	1	1
		14	1	1					18	1	1
		14	1	1					18	1	1
		14	1	1					18	1	1
		14	1	1					18	1	1
		14	1	1					18	1	1
		14	1	1					18	1	1
		14	1	1					18	1	1
		14	1	1					18	1	1
		14	1	1					18	1	1
		14	1	1					18	1	1
		14	1	1					18	1	1
		15	1	1					18	1	1
		15	1	1					18	1	1
		15	1	1					18	1	1
		15	1	1					18	1	1
		15	1	1					18	1	1
		15	1	1					18	1	1
		15	1	1					18	1	1
		15	1	1					18	1	1
		15	1	1					18	1	1
		15	1	1					18	1	1
		15	1	1					18	1	1
		15	1	1					18	1	1
		15	1	1					18	1	1
		15	1	1					18	1	1
		15	1	1					18	1	1
		15	1	1					18	1	1
		15	1	1					18	1	1
		15	1	1					18	1	1
		15	1	1					18	1	1
		15	1	1					18	1	1
		15	1	1					18	1	1
		15	1	1					18	1	1
		15	1	1					18	1	1
		15	1	1					18	1	1
		15	1	1					18	1	1
		15	1	1					18	1	1
		15	1	1					18	1	1
		15	1	1					18	1	1
		15	1	1					18	1	1
		15	1	1					18	1	1
		15	1	1					18	1	1
		15	1	1					18	1	1
		15	1	1					18	1	1
		15	1	1					18	1	1
		15	1	1					18	1	1
		15	1	1					18	1	1
		15	1	1					18	1	1
		15	1	1					18	1	1
		15	1	1					18	1	1
		15	1	1					18	1	1
		15	1	1					18	1	1
		15	1	1					18	1	1
		15	1	1					18	1	1
		15	1	1					18	1	1
		15	1	1					18	1	1
		15	1	1					18	1	1
		15	1	1					18	1	1
		15	1	1					18	1	1
		15	1	1					18	1	1
		15	1	1					18	1	1
		15	1	1					18	1	1
		15	1	1					18	1	1
		16	1	1					18	1	1
		16	1	1					18	1	1
		16	1	1					18	1	1
		16	1	1					18	1	1
		16	1	1					18	1	1
		16	1	1					18	1	1
		16	1	1					18	1	1
		16	1	1					18	1	1
		16	1	1					18	1	1
		16	1	1					18	1	1
		16	1	1					18	1	1
		16	1	1					18	1	1
		16	1	1					19	1	1
		16	1	1					19	1	1
		16	1	1					19	1	1
		16	1	1					19	1	1
		16	1	1					19	1	1
		16	1	1					19	1	1
		16	1	1					19	1	1
		16	1	1					19	1	1
		16	1	1					19	1	1
		16	1	1					19	1	1
		16	1	1					19	1	1
		16	1	1					19	1	1
		16	1	1					19	1	1
		16	1	1					19	1	1
		16	1	1					19	1	1
		17	1	1					19	1	1
		17	1	1					19	1	1
		17	1	1					13	2	1
		17	1	1					13	2	1
		17	1	1					13	2	1
		17	1	1					13	2	1
		17	1	1					13	2	1
		18	1	1					13	2	1
		18	1	1					13	2	1
		18	1	1					13	2	1
		18	1	1					13	2	1
		20	1	1					13	2	1
		20	1	1					13	2	1
		10	2	1					13	2	1
		10	2	1					13	2	1
		10	2	1					13	2	1
		10	2	1					13	2	1
		10	2	1					14	2	1
		10	2	1					14	2	1
		10	2	1					14	2	1
		10	2	1					14	2	1
		10	2	1					14	2	1
		10	2	1					14	2	1
		10	2	1					14	2	1
		10	2	1					14	2	1
		10	2	1					14	2	1
		10	2	1					14	2	1
		10	2	1					14	2	1
		10	2	1					14	2	1
		10	2	1					14	2	1
		10	2	1					14	2	1
		10	2	1					14	2	1
		10	2	1					14	2	1
		10	2	1					14	2	1
		10	2	1					14	2	1
		10	2	1					14	2	1
		10	2	1					14	2	1
		10	2	1					14	2	1
		10	2	1					14	2	1
		10	2	1					14	2	1
		10	2	1					14	2	1
		10	2	1					14	2	1
		10	2	1					14	2	1
		10	2	1					14	2	1
		10	2	1					14	2	1
		10	2	1					14	2	1
		10	2	1					14	2	1
		10	2	1					14	2	1
		10	2	1					15	2	1
		10	2	1					15	2	1
		10	2	1					15	2	1
		10	2	1					15	2	1
		10	2	1					15	2	1
		10	2	1					15	2	1
		10	2	1					15	2	1
		10	2	1					15	2	1
		10	2	1					15	2	1
		10	2	1					15	2	1
		10	2	1					15	2	1
		10	2	1					15	2	1
		10	2	1					15	2	1
		10	2	1					15	2	1
		10	2	1					15	2	1
		10	2	1					15	2	1
		10	2	1					15	2	1
		10	2	1					15	2	1
		10	2	1					15	2	1
		10	2	1					15	2	1
		10	2	1					15	2	1
		10	2	1					15	2	1
		10	2	1					15	2	1
		10	2	1					15	2	1
		10	2	1					15	2	1
		10	2	1					15	2	1
		10	2	1					15	2	1
		10	2	1					15	2	1
		10	2	1					15	2	1
		10	2	1					15	2	1
		10	2	1					15	2	1
		10	2	1					15	2	1
		10	2	1					17	2	1
		10	2	1					17	2	1
		10	2	1					17	2	1
		10	2	1					17	2	1
		10	2	1					17	2	1
		10	2	1					17	2	1
		10	2	1					17	2	1
		10	2	1					17	2	1
		10	2	1					17	2	1
		10	2	1					17	2	1
		10	2	1					17	2	1
		10	2	1					17	2	1
		10	2	1					17	2	1
		10	2	1					17	2	1
		10	2	1					17	2	1
		10	2	1					17	2	1
		10	2	1					17	2	1
		11	2	1					17	2	1
		11	2	1					17	2	1
		11	2	1					17	2	1
		11	2	1					17	2	1
		11	2	1					17	2	1
		11	2	1					17	2	1
		11	2	1					17	2	1
		11	2	1					17	2	1
		11	2	1					17	2	1
		11	2	1					17	2	1
		11	2	1					17	2	1
		11	2	1					17	2	1
		11	2	1					17	2	1
		11	2	1					17	2	1
		11	2	1					17	2	1
		11	2	1					17	2	1
		11	2	1					17	2	1
		11	2	1					17	2	1
		11	2	1					17	2	1
		11	2	1					17	2	1
		11	2	1					17	2	1
		11	2	1					17	2	1
		11	2	1					17	2	1
		11	2	1					17	2	1
		11	2	1					17	2	1
		11	2	1					17	2	1
		11	2	1					17	2	1
		11	2	1					17	2	1
		11	2	1					17	2	1
		11	2	1					17	2	1
		12	2	1					17	2	1
		12	2	1					17	2	1
		12	2	1					17	2	1
		12	2	1					17	2	1
		12	2	1					17	2	1
		12	2	1					17	2	1
		12	2	1					17	2	1
		12	2	1					17	2	1
		12	2	1					17	2	1
		12	2	1					17	2	1
		12	2	1					17	2	1
		12	2	1					17	2	1
		12	2	1					17	2	1
		12	2	1					17	2	1
		12	2	1					17	2	1
		12	2	1					17	2	1
		12	2	1					17	2	1
		12	2	1					17	2	1
		12	2	1					17	2	1
		13	2	1					17	2	1
		13	2	1					17	2	1
		13	2	1					17	2	1
		13	2	1					17	2	1
		13	2	1					17	2	1
		13	2	1					17	2	1
		13	2	1					17	2	1
		14	2	1					17	2	1
		14	2	1					17	2	1
		14	2	1					17	2	1
		14	2	1					17	2	1
		14	2	1					17	2	1
		14	2	1					17	2	1
		14	2	1					17	2	1
		14	2	1					17	2	1
		14	2	1					17	2	1
		14	2	1					17	2	1
		14	2	1					17	2	1
		14	2	1					17	2	1
		14	2	1					17	2	1
		14	2	1					17	2	1
		14	2	1					17	2	1
		14	2	1					17	2	1
		14	2	1					17	2	1
		14	2	1					17	2	1
		14	2	1					17	2	1
		14	2	1					17	2	1
		14	2	1					17	2	1
		14	2	1					17	2	1
		14	2	1					17	2	1
		14	2	1					17	2	1
		14	2	1					17	2	1
		14	2	1					17	2	1
		14	2	1					17	2	1
		14	2	1					17	2	1
		14	2	1					17	2	1
		14	2	1					17	2	1
		14	2	1					17	2	1
		14	2	1					17	2	1
		14	2	1					17	2	1
		14	2	1					17	2	1
		14	2	1					17	2	1
		14	2	1					17	2	1
		14	2	1					17	2	1
		14	2	1					17	2	1
		14	2	1					17	2	1
		15	2	1					17	2	1
		15	2	1					17	2	1
		15	2	1					17	2	1
		15	2	1					17	2	1
		15	2	1					17	2	1
		15	2	1					18	2	1
		15	2	1					18	2	1
		15	2	1					18	2	1
		15	2	1					18	2	1
		15	2	1					18	2	1
		15	2	1					18	2	1
		15	2	1					18	2	1
		15	2	1					18	2	1
		15	2	1					18	2	1
		15	2	1					18	2	1
		15	2	1					18	2	1
		15	2	1					18	2	1
		15	2	1					18	2	1
		15	2	1					18	2	1
		15	2	1					18	2	1
		15	2	1					18	2	1
		15	2	1					18	2	1
		15	2	1					18	2	1
		15	2	1					18	2	1
		15	2	1					18	2	1
		15	2	1					18	2	1
		15	2	1					18	2	1
		15	2	1					18	2	1
		15	2	1					18	2	1
		15	2	1					18	2	1
		15	2	1					18	2	1
		15	2	1					18	2	1
		15	2	1					18	2	1
		15	2	1					18	2	1
		15	2	1					18	2	1
		15	2	1					18	2	1
		15	2	1					18	2	1
		15	2	1					18	2	1
		15	2	1					18	2	1
		15	2	1					18	2	1
		15	2	1					18	2	1
		15	2	1					18	2	1
		16	2	1					18	2	1
		16	2	1					18	2	1
		16	2	1					18	2	1
		16	2	1					18	2	1
		16	2	1					18	2	1
		16	2	1					18	2	1
		16	2	1					18	2	1
		16	2	1					18	2	1
		16	2	1					18	2	1
		16	2	1					18	2	1
		16	2	1					18	2	1
		16	2	1					18	2	1
		16	2	1					18	2	1
		16	2	1					18	2	1
		16	2	1					18	2	1
		16	2	1					18	2	1
		16	2	1					18	2	1
		16	2	1					18	2	1
		16	2	1					18	2	1
		16	2	1					18	2	1
		16	2	1					18	2	1
		16	2	1					18	2	1
		16	2	1					18	2	1
		16	2	1					18	2	1
		16	2	1					18	2	1
		16	2	1					18	2	1
		16	2	1					18	2	1
		16	2	1					18	2	1
		16	2	1					18	2	1
		16	2	1					18	2	1
		16	2	1					18	2	1
		16	2	1					18	2	1
		16	2	1					18	2	1
		16	2	1					19	2	1
		16	2	1					19	2	1
		16	2	1					19	2	1
		17	2	1					19	2	1
		17	2	1					19	2	1
		17	2	1					19	2	1
		17	2	1					19	2	1
		17	2	1					19	2	1
		17	2	1					19	2	1
		17	2	1					19	2	1
		17	2	1					19	2	1
		17	2	1					19	2	1
		17	2	1					19	2	1
		17	2	1					19	2	1
		17	2	1					19	2	1
		17	2	1					19	2	1
		17	2	1					13	3	1
		17	2	1					13	3	1
		17	2	1					13	3	1
		17	2	1					13	3	1
		18	2	1					13	3	1
		18	2	1					13	3	1
		18	2	1					13	3	1
		18	2	1					13	3	1
		18	2	1					13	3	1
		18	2	1					13	3	1
		18	2	1					13	3	1
		19	2	1					13	3	1
		19	2	1					13	3	1
		19	2	1					13	3	1
		19	2	1					13	3	1
		19	2	1					13	3	1
		10	3	1					13	3	1
		10	3	1					13	3	1
		10	3	1					13	3	1
		11	3	1					13	3	1
		11	3	1					13	3	1
		11	3	1					13	3	1
		11	3	1					14	3	1
		11	3	1					14	3	1
		11	3	1					14	3	1
		11	3	1					14	3	1
		11	3	1					14	3	1
		11	3	1					14	3	1
		11	3	1					14	3	1
		11	3	1					14	3	1
		12	3	1					14	3	1
		12	3	1					14	3	1
		12	3	1					14	3	1
		12	3	1					14	3	1
		12	3	1					14	3	1
		12	3	1					14	3	1
		13	3	1					14	3	1
		13	3	1					14	3	1
		13	3	1					14	3	1
		13	3	1					14	3	1
		13	3	1					14	3	1
		13	3	1					14	3	1
		13	3	1					14	3	1
		14	3	1					14	3	1
		14	3	1					14	3	1
		14	3	1					14	3	1
		14	3	1					14	3	1
		14	3	1					14	3	1
		14	3	1					14	3	1
		14	3	1					14	3	1
		14	3	1					14	3	1
		14	3	1					14	3	1
		14	3	1					14	3	1
		14	3	1					14	3	1
		14	3	1					14	3	1
		14	3	1					14	3	1
		14	3	1					14	3	1
		14	3	1					14	3	1
		14	3	1					14	3	1
		14	3	1					14	3	1
		14	3	1					14	3	1
		14	3	1					14	3	1
		14	3	1					14	3	1
		14	3	1					14	3	1
		14	3	1					14	3	1
		14	3	1					14	3	1
		14	3	1					14	3	1
		14	3	1					14	3	1
		14	3	1					14	3	1
		14	3	1					14	3	1
		14	3	1					14	3	1
		14	3	1					14	3	1
		14	3	1					14	3	1
		14	3	1					14	3	1
		14	3	1					14	3	1
		14	3	1					14	3	1
		14	3	1					14	3	1
		14	3	1					14	3	1
		14	3	1					14	3	1
		14	3	1					15	3	1
		14	3	1					15	3	1
		14	3	1					15	3	1
		14	3	1					15	3	1
		14	3	1					15	3	1
		14	3	1					15	3	1
		14	3	1					15	3	1
		14	3	1					15	3	1
		14	3	1					15	3	1
		14	3	1					15	3	1
		14	3	1					15	3	1
		14	3	1					15	3	1
		14	3	1					15	3	1
		14	3	1					15	3	1
		14	3	1					15	3	1
		14	3	1					15	3	1
		14	3	1					15	3	1
		14	3	1					15	3	1
		14	3	1					15	3	1
		14	3	1					15	3	1
		14	3	1					15	3	1
		14	3	1					15	3	1
		14	3	1					15	3	1
		14	3	1					15	3	1
		14	3	1					15	3	1
		14	3	1					15	3	1
		14	3	1					15	3	1
		14	3	1					15	3	1
		14	3	1					15	3	1
		14	3	1					15	3	1
		14	3	1					17	3	1
		14	3	1					17	3	1
		14	3	1					17	3	1
		14	3	1					17	3	1
		14	3	1					17	3	1
		14	3	1					17	3	1
		14	3	1					17	3	1
		15	3	1					17	3	1
		15	3	1					17	3	1
		15	3	1					17	3	1
		15	3	1					17	3	1
		15	3	1					17	3	1
		15	3	1					17	3	1
		15	3	1					17	3	1
		15	3	1					17	3	1
		15	3	1					17	3	1
		15	3	1					17	3	1
		15	3	1					17	3	1
		15	3	1					17	3	1
		15	3	1					17	3	1
		15	3	1					17	3	1
		15	3	1					17	3	1
		15	3	1					17	3	1
		15	3	1					17	3	1
		15	3	1					17	3	1
		15	3	1					17	3	1
		15	3	1					17	3	1
		15	3	1					17	3	1
		15	3	1					17	3	1
		15	3	1					17	3	1
		15	3	1					17	3	1
		15	3	1					17	3	1
		15	3	1					17	3	1
		15	3	1					17	3	1
		15	3	1					17	3	1
		15	3	1					17	3	1
		15	3	1					17	3	1
		15	3	1					17	3	1
		15	3	1					17	3	1
		15	3	1					17	3	1
		15	3	1					17	3	1
		15	3	1					17	3	1
		15	3	1					17	3	1
		15	3	1					17	3	1
		15	3	1					17	3	1
		15	3	1					17	3	1
		15	3	1					17	3	1
		15	3	1					17	3	1
		15	3	1					17	3	1
		15	3	1					17	3	1
		15	3	1					17	3	1
		15	3	1					17	3	1
		15	3	1					17	3	1
		15	3	1					17	3	1
		15	3	1					17	3	1
		15	3	1					17	3	1
		15	3	1					17	3	1
		15	3	1					17	3	1
		15	3	1					17	3	1
		15	3	1					17	3	1
		15	3	1					17	3	1
		15	3	1					17	3	1
		15	3	1					17	3	1
		15	3	1					17	3	1
		15	3	1					17	3	1
		15	3	1					17	3	1
		15	3	1					17	3	1
		15	3	1					17	3	1
		15	3	1					17	3	1
		15	3	1					17	3	1
		15	3	1					17	3	1
		15	3	1					17	3	1
		15	3	1					17	3	1
		15	3	1					17	3	1
		15	3	1					17	3	1
		15	3	1					17	3	1
		15	3	1					17	3	1
		15	3	1					17	3	1
		15	3	1					17	3	1
		15	3	1					17	3	1
		15	3	1					17	3	1
		15	3	1					17	3	1
		15	3	1					17	3	1
		15	3	1					17	3	1
		15	3	1					17	3	1
		15	3	1					17	3	1
		15	3	1					17	3	1
		15	3	1					17	3	1
		15	3	1					17	3	1
		15	3	1					17	3	1
		15	3	1					17	3	1
		15	3	1					17	3	1
		15	3	1					17	3	1
		15	3	1					17	3	1
		15	3	1					17	3	1
		15	3	1					17	3	1
		15	3	1					17	3	1
		15	3	1					17	3	1
		15	3	1					18	3	1
		15	3	1					18	3	1
		15	3	1					18	3	1
		15	3	1					18	3	1
		15	3	1					18	3	1
		15	3	1					18	3	1
		15	3	1					18	3	1
		15	3	1					18	3	1
		15	3	1					18	3	1
		15	3	1					18	3	1
		15	3	1					18	3	1
		15	3	1					18	3	1
		15	3	1					18	3	1
		15	3	1					18	3	1
		15	3	1					18	3	1
		15	3	1					18	3	1
		15	3	1					18	3	1
		15	3	1					18	3	1
		15	3	1					18	3	1
		15	3	1					18	3	1
		15	3	1					18	3	1
		15	3	1					18	3	1
		15	3	1					18	3	1
		15	3	1					18	3	1
		15	3	1					18	3	1
		15	3	1					18	3	1
		15	3	1					18	3	1
		15	3	1					18	3	1
		15	3	1					18	3	1
		15	3	1					18	3	1
		15	3	1					18	3	1
		15	3	1					18	3	1
		15	3	1					18	3	1
		15	3	1					18	3	1
		15	3	1					18	3	1
		15	3	1					18	3	1
		15	3	1					18	3	1
		15	3	1					18	3	1
		15	3	1					18	3	1
		15	3	1					18	3	1
		15	3	1					18	3	1
		15	3	1					18	3	1
		15	3	1					18	3	1
		15	3	1					18	3	1
		15	3	1					18	3	1
		15	3	1					18	3	1
		15	3	1					18	3	1
		15	3	1					18	3	1
		15	3	1					18	3	1
		15	3	1					18	3	1
		15	3	1					18	3	1
		15	3	1					18	3	1
		15	3	1					18	3	1
		15	3	1					18	3	1
		15	3	1					19	3	1
		15	3	1					19	3	1
		16	3	1					19	3	1
		16	3	1					19	3	1
		16	3	1					19	3	1
		16	3	1					19	3	1
		16	3	1					19	3	1
		16	3	1					19	3	1
		16	3	1					19	3	1
		16	3	1					19	3	1
		16	3	1					19	3	1
		16	3	1					19	3	1
		16	3	1					19	3	1
		16	3	1					19	3	1
		16	3	1					19	3	1
		16	3	1					19	3	1
		16	3	1					19	3	1
		16	3	1					19	3	1
		16	3	1					19	3	1
		16	3	1					19	3	1
		16	3	1					13	1	2
		16	3	1					13	1	2
		16	3	1					13	1	2
		16	3	1					13	1	2
		16	3	1					13	1	2
		16	3	1					13	1	2
		16	3	1					13	1	2
		16	3	1					13	1	2
		16	3	1					13	1	2
		10	4	1					13	1	2
		10	4	1					13	1	2
		10	4	1					13	1	2
		10	4	1					13	1	2
		10	4	1					13	1	2
		10	4	1					13	1	2
		10	4	1					13	1	2
		10	4	1					13	1	2
		10	4	1					13	1	2
		10	4	1					13	1	2
		10	4	1					13	1	2
		10	4	1					13	1	2
		10	4	1					13	1	2
		10	4	1					13	1	2
		10	4	1					14	1	2
		10	4	1					14	1	2
		10	4	1					14	1	2
		10	4	1					14	1	2
		10	4	1					14	1	2
		10	4	1					14	1	2
		10	4	1					14	1	2
		11	4	1					14	1	2
		11	4	1					14	1	2
		11	4	1					14	1	2
		11	4	1					14	1	2
		11	4	1					14	1	2
		12	4	1					14	1	2
		13	4	1					14	1	2
		13	4	1					14	1	2
		13	4	1					14	1	2
		13	4	1					15	1	2
		13	4	1					15	1	2
		13	4	1					15	1	2
		13	4	1					15	1	2
		13	4	1					15	1	2
		13	4	1					15	1	2
		13	4	1					15	1	2
		13	4	1					15	1	2
		13	4	1					15	1	2
		13	4	1					15	1	2
		13	4	1					15	1	2
		13	4	1					15	1	2
		14	4	1					15	1	2
		14	4	1					15	1	2
		14	4	1					15	1	2
		14	4	1					15	1	2
		14	4	1					15	1	2
		14	4	1					15	1	2
		14	4	1					15	1	2
		14	4	1					15	1	2
		14	4	1					15	1	2
		14	4	1					15	1	2
		14	4	1					15	1	2
		14	4	1					15	1	2
		14	4	1					15	1	2
		14	4	1					15	1	2
		14	4	1					15	1	2
		14	4	1					15	1	2
		14	4	1					15	1	2
		14	4	1					15	1	2
		14	4	1					15	1	2
		14	4	1					15	1	2
		14	4	1					15	1	2
		14	4	1					15	1	2
		14	4	1					15	1	2
		14	4	1					15	1	2
		14	4	1					15	1	2
		14	4	1					15	1	2
		14	4	1					15	1	2
		14	4	1					15	1	2
		14	4	1					15	1	2
		14	4	1					15	1	2
		14	4	1					15	1	2
		14	4	1					15	1	2
		14	4	1					15	1	2
		14	4	1					15	1	2
		14	4	1					15	1	2
		14	4	1					15	1	2
		14	4	1					15	1	2
		14	4	1					15	1	2
		14	4	1					15	1	2
		14	4	1					15	1	2
		14	4	1					15	1	2
		14	4	1					15	1	2
		14	4	1					15	1	2
		14	4	1					15	1	2
		14	4	1					15	1	2
		14	4	1					15	1	2
		14	4	1					15	1	2
		14	4	1					17	1	2
		14	4	1					17	1	2
		14	4	1					17	1	2
		14	4	1					17	1	2
		14	4	1					17	1	2
		14	4	1					17	1	2
		14	4	1					17	1	2
		14	4	1					17	1	2
		14	4	1					17	1	2
		14	4	1					17	1	2
		14	4	1					17	1	2
		14	4	1					17	1	2
		14	4	1					17	1	2
		14	4	1					17	1	2
		14	4	1					17	1	2
		14	4	1					17	1	2
		14	4	1					17	1	2
		14	4	1					17	1	2
		14	4	1					17	1	2
		14	4	1					17	1	2
		14	4	1					17	1	2
		14	4	1					17	1	2
		14	4	1					17	1	2
		14	4	1					17	1	2
		14	4	1					17	1	2
		14	4	1					17	1	2
		14	4	1					17	1	2
		14	4	1					17	1	2
		14	4	1					17	1	2
		14	4	1					17	1	2
		14	4	1					17	1	2
		14	4	1					17	1	2
		14	4	1					17	1	2
		14	4	1					17	1	2
		14	4	1					17	1	2
		14	4	1					17	1	2
		14	4	1					17	1	2
		14	4	1					17	1	2
		14	4	1					17	1	2
		14	4	1					17	1	2
		14	4	1					17	1	2
		14	4	1					17	1	2
		15	4	1					17	1	2
		15	4	1					17	1	2
		15	4	1					17	1	2
		15	4	1					17	1	2
		15	4	1					17	1	2
		15	4	1					17	1	2
		15	4	1					17	1	2
		15	4	1					17	1	2
		15	4	1					17	1	2
		15	4	1					17	1	2
		15	4	1					17	1	2
		15	4	1					17	1	2
		15	4	1					17	1	2
		15	4	1					17	1	2
		15	4	1					17	1	2
		15	4	1					17	1	2
		15	4	1					17	1	2
		15	4	1					17	1	2
		15	4	1					17	1	2
		15	4	1					17	1	2
		15	4	1					17	1	2
		15	4	1					17	1	2
		15	4	1					17	1	2
		15	4	1					17	1	2
		15	4	1					17	1	2
		15	4	1					17	1	2
		15	4	1					17	1	2
		15	4	1					17	1	2
		15	4	1					17	1	2
		15	4	1					17	1	2
		15	4	1					17	1	2
		15	4	1					17	1	2
		15	4	1					17	1	2
		15	4	1					17	1	2
		15	4	1					17	1	2
		15	4	1					17	1	2
		15	4	1					17	1	2
		15	4	1					17	1	2
		15	4	1					17	1	2
		15	4	1					17	1	2
		15	4	1					17	1	2
		15	4	1					17	1	2
		15	4	1					17	1	2
		15	4	1					17	1	2
		15	4	1					17	1	2
		15	4	1					17	1	2
		15	4	1					17	1	2
		15	4	1					17	1	2
		15	4	1					17	1	2
		15	4	1					17	1	2
		15	4	1					17	1	2
		15	4	1					17	1	2
		15	4	1					17	1	2
		15	4	1					17	1	2
		15	4	1					17	1	2
		15	4	1					17	1	2
		15	4	1					17	1	2
		15	4	1					17	1	2
		15	4	1					17	1	2
		15	4	1					17	1	2
		15	4	1					17	1	2
		15	4	1					17	1	2
		15	4	1					17	1	2
		15	4	1					17	1	2
		15	4	1					17	1	2
		15	4	1					17	1	2
		15	4	1					17	1	2
		15	4	1					17	1	2
		15	4	1					17	1	2
		15	4	1					17	1	2
		15	4	1					17	1	2
		15	4	1					17	1	2
		15	4	1					17	1	2
		15	4	1					17	1	2
		15	4	1					17	1	2
		15	4	1					17	1	2
		15	4	1					17	1	2
		15	4	1					17	1	2
		15	4	1					17	1	2
		15	4	1					17	1	2
		15	4	1					17	1	2
		15	4	1					17	1	2
		15	4	1					17	1	2
		15	4	1					17	1	2
		15	4	1					17	1	2
		15	4	1					18	1	2
		15	4	1					18	1	2
		15	4	1					18	1	2
		15	4	1					18	1	2
		16	4	1					18	1	2
		16	4	1					18	1	2
		16	4	1					18	1	2
		16	4	1					18	1	2
		16	4	1					18	1	2
		16	4	1					18	1	2
		16	4	1					18	1	2
		16	4	1					18	1	2
		16	4	1					18	1	2
		16	4	1					18	1	2
		16	4	1					18	1	2
		16	4	1					18	1	2
		16	4	1					18	1	2
		16	4	1					18	1	2
		16	4	1					18	1	2
		16	4	1					18	1	2
		16	4	1					18	1	2
		16	4	1					18	1	2
		16	4	1					18	1	2
		16	4	1					18	1	2
		16	4	1					18	1	2
		17	4	1					18	1	2
		17	4	1					18	1	2
		17	4	1					18	1	2
		17	4	1					18	1	2
		17	4	1					18	1	2
		17	4	1					18	1	2
		17	4	1					18	1	2
		17	4	1					18	1	2
		17	4	1					18	1	2
		17	4	1					18	1	2
		18	4	1					18	1	2
		18	4	1					18	1	2
		18	4	1					18	1	2
		18	4	1					18	1	2
		18	4	1					18	1	2
		18	4	1					18	1	2
		18	4	1					18	1	2
		20	4	1					18	1	2
		20	4	1					18	1	2
		20	4	1					18	1	2
		22	4	1					18	1	2
		9	1	2					18	1	2
		9	1	2					18	1	2
		9	1	2					18	1	2
		9	1	2					18	1	2
		9	1	2					18	1	2
		9	1	2					18	1	2
		9	1	2					18	1	2
		9	1	2					18	1	2
		9	1	2					18	1	2
		9	1	2					18	1	2
		9	1	2					19	1	2
		9	1	2					19	1	2
		9	1	2					19	1	2
		9	1	2					19	1	2
		9	1	2					19	1	2
		10	1	2					13	2	2
		10	1	2					13	2	2
		10	1	2					13	2	2
		10	1	2					13	2	2
		10	1	2					13	2	2
		10	1	2					13	2	2
		10	1	2					13	2	2
		10	1	2					13	2	2
		10	1	2					13	2	2
		10	1	2					13	2	2
		10	1	2					13	2	2
		10	1	2					13	2	2
		10	1	2					13	2	2
		10	1	2					13	2	2
		10	1	2					13	2	2
		10	1	2					13	2	2
		10	1	2					13	2	2
		10	1	2					13	2	2
		10	1	2					13	2	2
		10	1	2					13	2	2
		10	1	2					13	2	2
		10	1	2					13	2	2
		10	1	2					13	2	2
		10	1	2					13	2	2
		10	1	2					13	2	2
		10	1	2					14	2	2
		10	1	2					14	2	2
		10	1	2					14	2	2
		10	1	2					14	2	2
		10	1	2					14	2	2
		10	1	2					14	2	2
		10	1	2					14	2	2
		10	1	2					14	2	2
		10	1	2					14	2	2
		10	1	2					14	2	2
		10	1	2					14	2	2
		10	1	2					14	2	2
		10	1	2					14	2	2
		11	1	2					14	2	2
		11	1	2					14	2	2
		11	1	2					14	2	2
		11	1	2					14	2	2
		11	1	2					14	2	2
		11	1	2					14	2	2
		11	1	2					15	2	2
		11	1	2					15	2	2
		11	1	2					15	2	2
		11	1	2					15	2	2
		11	1	2					15	2	2
		11	1	2					15	2	2
		11	1	2					15	2	2
		11	1	2					15	2	2
		11	1	2					15	2	2
		11	1	2					15	2	2
		11	1	2					15	2	2
		11	1	2					15	2	2
		11	1	2					15	2	2
		11	1	2					15	2	2
		11	1	2					15	2	2
		11	1	2					15	2	2
		11	1	2					15	2	2
		11	1	2					15	2	2
		11	1	2					15	2	2
		11	1	2					15	2	2
		11	1	2					15	2	2
		11	1	2					15	2	2
		11	1	2					15	2	2
		11	1	2					15	2	2
		11	1	2					15	2	2
		11	1	2					15	2	2
		11	1	2					15	2	2
		11	1	2					15	2	2
		11	1	2					15	2	2
		11	1	2					15	2	2
		11	1	2					15	2	2
		11	1	2					15	2	2
		11	1	2					15	2	2
		11	1	2					15	2	2
		11	1	2					15	2	2
		11	1	2					15	2	2
		11	1	2					15	2	2
		11	1	2					15	2	2
		11	1	2					15	2	2
		11	1	2					15	2	2
		11	1	2					15	2	2
		11	1	2					15	2	2
		11	1	2					15	2	2
		11	1	2					15	2	2
		11	1	2					15	2	2
		11	1	2					15	2	2
		11	1	2					15	2	2
		11	1	2					15	2	2
		11	1	2					15	2	2
		11	1	2					15	2	2
		11	1	2					15	2	2
		11	1	2					15	2	2
		11	1	2					15	2	2
		11	1	2					15	2	2
		11	1	2					15	2	2
		11	1	2					15	2	2
		11	1	2					15	2	2
		11	1	2					15	2	2
		11	1	2					15	2	2
		11	1	2					15	2	2
		11	1	2					15	2	2
		11	1	2					15	2	2
		11	1	2					17	2	2
		11	1	2					17	2	2
		11	1	2					17	2	2
		11	1	2					17	2	2
		11	1	2					17	2	2
		11	1	2					17	2	2
		11	1	2					17	2	2
		11	1	2					17	2	2
		11	1	2					17	2	2
		11	1	2					17	2	2
		11	1	2					17	2	2
		11	1	2					17	2	2
		11	1	2					17	2	2
		11	1	2					17	2	2
		11	1	2					17	2	2
		11	1	2					17	2	2
		11	1	2					17	2	2
		11	1	2					17	2	2
		11	1	2					17	2	2
		11	1	2					17	2	2
		11	1	2					17	2	2
		11	1	2					17	2	2
		11	1	2					17	2	2
		11	1	2					17	2	2
		11	1	2					17	2	2
		11	1	2					17	2	2
		12	1	2					17	2	2
		12	1	2					17	2	2
		12	1	2					17	2	2
		12	1	2					17	2	2
		12	1	2					17	2	2
		12	1	2					17	2	2
		12	1	2					17	2	2
		12	1	2					17	2	2
		12	1	2					17	2	2
		12	1	2					17	2	2
		12	1	2					17	2	2
		12	1	2					17	2	2
		12	1	2					17	2	2
		12	1	2					17	2	2
		12	1	2					17	2	2
		12	1	2					17	2	2
		12	1	2					17	2	2
		12	1	2					17	2	2
		12	1	2					17	2	2
		12	1	2					17	2	2
		12	1	2					17	2	2
		12	1	2					17	2	2
		12	1	2					17	2	2
		12	1	2					17	2	2
		12	1	2					17	2	2
		12	1	2					17	2	2
		12	1	2					17	2	2
		12	1	2					17	2	2
		12	1	2					17	2	2
		12	1	2					17	2	2
		13	1	2					17	2	2
		13	1	2					17	2	2
		13	1	2					17	2	2
		13	1	2					17	2	2
		13	1	2					17	2	2
		13	1	2					17	2	2
		13	1	2					17	2	2
		13	1	2					17	2	2
		13	1	2					17	2	2
		13	1	2					17	2	2
		13	1	2					17	2	2
		13	1	2					17	2	2
		13	1	2					17	2	2
		13	1	2					17	2	2
		13	1	2					17	2	2
		13	1	2					17	2	2
		13	1	2					17	2	2
		13	1	2					17	2	2
		13	1	2					17	2	2
		13	1	2					17	2	2
		13	1	2					17	2	2
		13	1	2					17	2	2
		13	1	2					17	2	2
		13	1	2					17	2	2
		13	1	2					17	2	2
		13	1	2					17	2	2
		13	1	2					17	2	2
		13	1	2					17	2	2
		13	1	2					17	2	2
		13	1	2					17	2	2
		13	1	2					17	2	2
		13	1	2					17	2	2
		13	1	2					17	2	2
		13	1	2					17	2	2
		13	1	2					17	2	2
		13	1	2					17	2	2
		13	1	2					17	2	2
		13	1	2					17	2	2
		13	1	2					17	2	2
		13	1	2					17	2	2
		13	1	2					17	2	2
		13	1	2					17	2	2
		13	1	2					17	2	2
		13	1	2					17	2	2
		13	1	2					17	2	2
		13	1	2					17	2	2
		13	1	2					17	2	2
		13	1	2					17	2	2
		13	1	2					17	2	2
		13	1	2					17	2	2
		13	1	2					17	2	2
		13	1	2					17	2	2
		13	1	2					17	2	2
		13	1	2					17	2	2
		13	1	2					17	2	2
		13	1	2					17	2	2
		13	1	2					17	2	2
		13	1	2					17	2	2
		13	1	2					18	2	2
		13	1	2					18	2	2
		13	1	2					18	2	2
		14	1	2					18	2	2
		14	1	2					18	2	2
		14	1	2					18	2	2
		14	1	2					18	2	2
		14	1	2					18	2	2
		14	1	2					18	2	2
		14	1	2					18	2	2
		14	1	2					18	2	2
		14	1	2					18	2	2
		14	1	2					18	2	2
		14	1	2					18	2	2
		14	1	2					18	2	2
		14	1	2					18	2	2
		14	1	2					18	2	2
		14	1	2					18	2	2
		14	1	2					18	2	2
		14	1	2					18	2	2
		14	1	2					18	2	2
		14	1	2					18	2	2
		14	1	2					18	2	2
		14	1	2					18	2	2
		14	1	2					18	2	2
		14	1	2					18	2	2
		14	1	2					18	2	2
		14	1	2					18	2	2
		14	1	2					18	2	2
		14	1	2					18	2	2
		14	1	2					18	2	2
		14	1	2					18	2	2
		14	1	2					18	2	2
		14	1	2					18	2	2
		14	1	2					18	2	2
		14	1	2					18	2	2
		14	1	2					18	2	2
		14	1	2					18	2	2
		14	1	2					18	2	2
		14	1	2					18	2	2
		14	1	2					18	2	2
		14	1	2					18	2	2
		14	1	2					18	2	2
		14	1	2					18	2	2
		14	1	2					18	2	2
		14	1	2					18	2	2
		14	1	2					18	2	2
		14	1	2					18	2	2
		14	1	2					18	2	2
		14	1	2					18	2	2
		14	1	2					18	2	2
		14	1	2					18	2	2
		14	1	2					18	2	2
		14	1	2					18	2	2
		14	1	2					18	2	2
		14	1	2					18	2	2
		14	1	2					18	2	2
		14	1	2					18	2	2
		14	1	2					18	2	2
		14	1	2					19	2	2
		14	1	2					19	2	2
		14	1	2					19	2	2
		15	1	2					19	2	2
		15	1	2					19	2	2
		15	1	2					19	2	2
		15	1	2					13	3	2
		15	1	2					13	3	2
		15	1	2					13	3	2
		15	1	2					13	3	2
		18	1	2					13	3	2
		20	1	2					13	3	2
		9	2	2					13	3	2
		9	2	2					13	3	2
		9	2	2					13	3	2
		10	2	2					13	3	2
		10	2	2					13	3	2
		10	2	2					13	3	2
		10	2	2					13	3	2
		10	2	2					13	3	2
		10	2	2					13	3	2
		10	2	2					13	3	2
		10	2	2					13	3	2
		10	2	2					13	3	2
		10	2	2					13	3	2
		10	2	2					13	3	2
		10	2	2					13	3	2
		10	2	2					13	3	2
		10	2	2					13	3	2
		10	2	2					13	3	2
		10	2	2					13	3	2
		10	2	2					13	3	2
		10	2	2					14	3	2
		10	2	2					14	3	2
		10	2	2					14	3	2
		10	2	2					14	3	2
		10	2	2					14	3	2
		10	2	2					14	3	2
		10	2	2					14	3	2
		10	2	2					14	3	2
		10	2	2					14	3	2
		10	2	2					14	3	2
		10	2	2					14	3	2
		10	2	2					14	3	2
		10	2	2					14	3	2
		10	2	2					14	3	2
		10	2	2					14	3	2
		10	2	2					14	3	2
		10	2	2					14	3	2
		10	2	2					14	3	2
		10	2	2					14	3	2
		10	2	2					14	3	2
		10	2	2					15	3	2
		10	2	2					15	3	2
		10	2	2					15	3	2
		10	2	2					15	3	2
		10	2	2					15	3	2
		10	2	2					15	3	2
		10	2	2					15	3	2
		10	2	2					15	3	2
		10	2	2					15	3	2
		10	2	2					15	3	2
		10	2	2					15	3	2
		10	2	2					15	3	2
		10	2	2					15	3	2
		10	2	2					15	3	2
		10	2	2					15	3	2
		10	2	2					15	3	2
		10	2	2					15	3	2
		10	2	2					15	3	2
		10	2	2					15	3	2
		10	2	2					15	3	2
		10	2	2					15	3	2
		10	2	2					15	3	2
		10	2	2					15	3	2
		11	2	2					15	3	2
		11	2	2					15	3	2
		11	2	2					15	3	2
		11	2	2					15	3	2
		11	2	2					15	3	2
		11	2	2					15	3	2
		11	2	2					15	3	2
		11	2	2					15	3	2
		11	2	2					15	3	2
		11	2	2					15	3	2
		11	2	2					15	3	2
		11	2	2					15	3	2
		11	2	2					15	3	2
		11	2	2					15	3	2
		11	2	2					15	3	2
		11	2	2					15	3	2
		11	2	2					15	3	2
		11	2	2					15	3	2
		11	2	2					15	3	2
		11	2	2					15	3	2
		11	2	2					15	3	2
		11	2	2					15	3	2
		11	2	2					15	3	2
		11	2	2					15	3	2
		11	2	2					15	3	2
		11	2	2					15	3	2
		11	2	2					15	3	2
		11	2	2					15	3	2
		11	2	2					15	3	2
		11	2	2					15	3	2
		11	2	2					15	3	2
		11	2	2					15	3	2
		11	2	2					15	3	2
		11	2	2					15	3	2
		11	2	2					15	3	2
		11	2	2					15	3	2
		11	2	2					15	3	2
		11	2	2					15	3	2
		11	2	2					15	3	2
		11	2	2					15	3	2
		11	2	2					15	3	2
		11	2	2					15	3	2
		11	2	2					15	3	2
		11	2	2					15	3	2
		11	2	2					15	3	2
		11	2	2					15	3	2
		12	2	2					17	3	2
		12	2	2					17	3	2
		12	2	2					17	3	2
		12	2	2					17	3	2
		12	2	2					17	3	2
		12	2	2					17	3	2
		12	2	2					17	3	2
		12	2	2					17	3	2
		12	2	2					17	3	2
		12	2	2					17	3	2
		12	2	2					17	3	2
		12	2	2					17	3	2
		12	2	2					17	3	2
		12	2	2					17	3	2
		12	2	2					17	3	2
		12	2	2					17	3	2
		12	2	2					17	3	2
		12	2	2					17	3	2
		12	2	2					17	3	2
		12	2	2					17	3	2
		12	2	2					17	3	2
		12	2	2					17	3	2
		12	2	2					17	3	2
		12	2	2					17	3	2
		13	2	2					17	3	2
		13	2	2					17	3	2
		13	2	2					17	3	2
		13	2	2					17	3	2
		13	2	2					17	3	2
		13	2	2					17	3	2
		13	2	2					17	3	2
		13	2	2					17	3	2
		13	2	2					17	3	2
		13	2	2					17	3	2
		13	2	2					17	3	2
		13	2	2					17	3	2
		13	2	2					17	3	2
		13	2	2					17	3	2
		13	2	2					17	3	2
		13	2	2					17	3	2
		13	2	2					17	3	2
		13	2	2					17	3	2
		13	2	2					17	3	2
		13	2	2					17	3	2
		13	2	2					17	3	2
		13	2	2					17	3	2
		13	2	2					17	3	2
		13	2	2					17	3	2
		13	2	2					17	3	2
		13	2	2					17	3	2
		13	2	2					17	3	2
		13	2	2					17	3	2
		13	2	2					17	3	2
		13	2	2					17	3	2
		13	2	2					17	3	2
		13	2	2					17	3	2
		13	2	2					17	3	2
		13	2	2					17	3	2
		14	2	2					17	3	2
		14	2	2					17	3	2
		14	2	2					17	3	2
		14	2	2					17	3	2
		14	2	2					17	3	2
		14	2	2					17	3	2
		14	2	2					17	3	2
		14	2	2					17	3	2
		14	2	2					17	3	2
		14	2	2					17	3	2
		14	2	2					17	3	2
		14	2	2					17	3	2
		14	2	2					17	3	2
		14	2	2					17	3	2
		14	2	2					17	3	2
		14	2	2					17	3	2
		14	2	2					17	3	2
		14	2	2					17	3	2
		14	2	2					17	3	2
		14	2	2					17	3	2
		14	2	2					17	3	2
		14	2	2					17	3	2
		14	2	2					17	3	2
		14	2	2					17	3	2
		14	2	2					17	3	2
		14	2	2					17	3	2
		14	2	2					17	3	2
		14	2	2					17	3	2
		14	2	2					17	3	2
		14	2	2					17	3	2
		14	2	2					17	3	2
		14	2	2					17	3	2
		14	2	2					17	3	2
		14	2	2					17	3	2
		14	2	2					17	3	2
		14	2	2					17	3	2
		14	2	2					17	3	2
		14	2	2					17	3	2
		14	2	2					17	3	2
		14	2	2					17	3	2
		14	2	2					17	3	2
		14	2	2					17	3	2
		14	2	2					17	3	2
		14	2	2					17	3	2
		14	2	2					17	3	2
		14	2	2					17	3	2
		14	2	2					17	3	2
		14	2	2					17	3	2
		14	2	2					17	3	2
		14	2	2					17	3	2
		14	2	2					17	3	2
		14	2	2					17	3	2
		14	2	2					18	3	2
		14	2	2					18	3	2
		14	2	2					18	3	2
		14	2	2					18	3	2
		14	2	2					18	3	2
		14	2	2					18	3	2
		14	2	2					18	3	2
		14	2	2					18	3	2
		14	2	2					18	3	2
		14	2	2					18	3	2
		14	2	2					18	3	2
		14	2	2					18	3	2
		14	2	2					18	3	2
		14	2	2					18	3	2
		14	2	2					18	3	2
		14	2	2					18	3	2
		14	2	2					18	3	2
		14	2	2					18	3	2
		14	2	2					18	3	2
		14	2	2					18	3	2
		14	2	2					18	3	2
		14	2	2					18	3	2
		14	2	2					18	3	2
		14	2	2					18	3	2
		14	2	2					18	3	2
		14	2	2					18	3	2
		14	2	2					18	3	2
		14	2	2					18	3	2
		14	2	2					18	3	2
		14	2	2					18	3	2
		14	2	2					18	3	2
		14	2	2					18	3	2
		14	2	2					18	3	2
		14	2	2					18	3	2
		14	2	2					18	3	2
		14	2	2					18	3	2
		14	2	2					18	3	2
		15	2	2					18	3	2
		15	2	2					18	3	2
		15	2	2					18	3	2
		15	2	2					18	3	2
		15	2	2					18	3	2
		15	2	2					18	3	2
		15	2	2					18	3	2
		16	2	2					18	3	2
		16	2	2					18	3	2
		16	2	2					18	3	2
		16	2	2					18	3	2
		16	2	2					18	3	2
		16	2	2					19	3	2
		16	2	2					19	3	2
		16	2	2					19	3	2
		16	2	2					19	3	2
		16	2	2					19	3	2
		16	2	2					19	3	2
		16	2	2					19	3	2
		16	2	2					19	3	2
		16	2	2					19	3	2
		17	2	2					13	4	2
		18	2	2					13	4	2
		18	2	2					13	4	2
		9	3	2					13	4	2
		10	3	2					13	4	2
		10	3	2					13	4	2
		10	3	2					13	4	2
		10	3	2					13	4	2
		10	3	2					13	4	2
		10	3	2					13	4	2
		10	3	2					13	4	2
		10	3	2					13	4	2
		10	3	2					13	4	2
		10	3	2					13	4	2
		10	3	2					13	4	2
		11	3	2					13	4	2
		11	3	2					13	4	2
		11	3	2					13	4	2
		11	3	2					13	4	2
		11	3	2					13	4	2
		11	3	2					13	4	2
		11	3	2					13	4	2
		11	3	2					14	4	2
		11	3	2					14	4	2
		11	3	2					14	4	2
		11	3	2					14	4	2
		11	3	2					14	4	2
		11	3	2					14	4	2
		11	3	2					14	4	2
		11	3	2					14	4	2
		11	3	2					14	4	2
		11	3	2					14	4	2
		11	3	2					14	4	2
		11	3	2					14	4	2
		11	3	2					14	4	2
		11	3	2					14	4	2
		11	3	2					14	4	2
		11	3	2					14	4	2
		11	3	2					14	4	2
		11	3	2					14	4	2
		11	3	2					14	4	2
		11	3	2					14	4	2
		11	3	2					14	4	2
		12	3	2					14	4	2
		12	3	2					14	4	2
		12	3	2					14	4	2
		12	3	2					14	4	2
		12	3	2					14	4	2
		12	3	2					14	4	2
		12	3	2					14	4	2
		12	3	2					15	4	2
		12	3	2					15	4	2
		12	3	2					15	4	2
		12	3	2					15	4	2
		12	3	2					15	4	2
		12	3	2					15	4	2
		12	3	2					15	4	2
		12	3	2					15	4	2
		12	3	2					15	4	2
		12	3	2					15	4	2
		12	3	2					15	4	2
		12	3	2					15	4	2
		12	3	2					15	4	2
		12	3	2					15	4	2
		12	3	2					15	4	2
		12	3	2					15	4	2
		12	3	2					15	4	2
		12	3	2					15	4	2
		12	3	2					15	4	2
		12	3	2					15	4	2
		12	3	2					15	4	2
		12	3	2					15	4	2
		12	3	2					15	4	2
		12	3	2					15	4	2
		12	3	2					15	4	2
		12	3	2					15	4	2
		12	3	2					15	4	2
		12	3	2					15	4	2
		12	3	2					15	4	2
		12	3	2					15	4	2
		12	3	2					15	4	2
		12	3	2					15	4	2
		12	3	2					15	4	2
		12	3	2					15	4	2
		12	3	2					15	4	2
		12	3	2					15	4	2
		12	3	2					15	4	2
		12	3	2					15	4	2
		12	3	2					15	4	2
		12	3	2					15	4	2
		12	3	2					15	4	2
		12	3	2					15	4	2
		12	3	2					15	4	2
		12	3	2					15	4	2
		12	3	2					15	4	2
		12	3	2					15	4	2
		12	3	2					15	4	2
		12	3	2					15	4	2
		12	3	2					15	4	2
		12	3	2					15	4	2
		12	3	2					15	4	2
		12	3	2					15	4	2
		12	3	2					15	4	2
		12	3	2					15	4	2
		12	3	2					15	4	2
		12	3	2					15	4	2
		12	3	2					15	4	2
		12	3	2					15	4	2
		12	3	2					15	4	2
		12	3	2					15	4	2
		12	3	2					15	4	2
		12	3	2					15	4	2
		12	3	2					15	4	2
		12	3	2					15	4	2
		12	3	2					15	4	2
		12	3	2					15	4	2
		13	3	2					15	4	2
		13	3	2					15	4	2
		13	3	2					15	4	2
		13	3	2					15	4	2
		13	3	2					15	4	2
		13	3	2					15	4	2
		13	3	2					15	4	2
		13	3	2					15	4	2
		13	3	2					15	4	2
		13	3	2					15	4	2
		13	3	2					17	4	2
		13	3	2					17	4	2
		13	3	2					17	4	2
		13	3	2					17	4	2
		13	3	2					17	4	2
		13	3	2					17	4	2
		13	3	2					17	4	2
		13	3	2					17	4	2
		13	3	2					17	4	2
		13	3	2					17	4	2
		13	3	2					17	4	2
		13	3	2					17	4	2
		13	3	2					17	4	2
		13	3	2					17	4	2
		13	3	2					17	4	2
		13	3	2					17	4	2
		13	3	2					17	4	2
		13	3	2					17	4	2
		13	3	2					17	4	2
		13	3	2					17	4	2
		13	3	2					17	4	2
		13	3	2					17	4	2
		13	3	2					17	4	2
		13	3	2					17	4	2
		13	3	2					17	4	2
		13	3	2					17	4	2
		13	3	2					17	4	2
		13	3	2					17	4	2
		13	3	2					17	4	2
		13	3	2					17	4	2
		13	3	2					17	4	2
		13	3	2					17	4	2
		13	3	2					17	4	2
		13	3	2					17	4	2
		13	3	2					17	4	2
		13	3	2					17	4	2
		13	3	2					17	4	2
		13	3	2					17	4	2
		13	3	2					17	4	2
		13	3	2					17	4	2
		13	3	2					17	4	2
		13	3	2					17	4	2
		13	3	2					17	4	2
		13	3	2					17	4	2
		13	3	2					17	4	2
		13	3	2					17	4	2
		13	3	2					17	4	2
		13	3	2					17	4	2
		13	3	2					17	4	2
		13	3	2					17	4	2
		13	3	2					17	4	2
		13	3	2					17	4	2
		13	3	2					17	4	2
		13	3	2					17	4	2
		13	3	2					17	4	2
		13	3	2					17	4	2
		13	3	2					17	4	2
		13	3	2					17	4	2
		13	3	2					17	4	2
		13	3	2					17	4	2
		13	3	2					17	4	2
		13	3	2					17	4	2
		13	3	2					17	4	2
		13	3	2					17	4	2
		13	3	2					17	4	2
		13	3	2					17	4	2
		13	3	2					17	4	2
		13	3	2					17	4	2
		13	3	2					17	4	2
		13	3	2					17	4	2
		13	3	2					17	4	2
		13	3	2					17	4	2
		13	3	2					17	4	2
		13	3	2					17	4	2
		13	3	2					17	4	2
		14	3	2					17	4	2
		14	3	2					17	4	2
		14	3	2					17	4	2
		14	3	2					17	4	2
		14	3	2					17	4	2
		14	3	2					17	4	2
		14	3	2					17	4	2
		14	3	2					17	4	2
		14	3	2					17	4	2
		14	3	2					17	4	2
		14	3	2					17	4	2
		14	3	2					17	4	2
		14	3	2					17	4	2
		14	3	2					17	4	2
		14	3	2					17	4	2
		14	3	2					17	4	2
		14	3	2					17	4	2
		14	3	2					17	4	2
		14	3	2					17	4	2
		14	3	2					17	4	2
		14	3	2					17	4	2
		14	3	2					17	4	2
		14	3	2					17	4	2
		14	3	2					17	4	2
		14	3	2					17	4	2
		14	3	2					17	4	2
		14	3	2					17	4	2
		14	3	2					17	4	2
		14	3	2					17	4	2
		14	3	2					17	4	2
		14	3	2					17	4	2
		14	3	2					17	4	2
		14	3	2					17	4	2
		14	3	2					17	4	2
		14	3	2					17	4	2
		14	3	2					17	4	2
		14	3	2					17	4	2
		14	3	2					17	4	2
		14	3	2					17	4	2
		14	3	2					17	4	2
		14	3	2					17	4	2
		14	3	2					17	4	2
		14	3	2					17	4	2
		14	3	2					17	4	2
		14	3	2					17	4	2
		14	3	2					17	4	2
		14	3	2					17	4	2
		14	3	2					17	4	2
		14	3	2					17	4	2
		14	3	2					18	4	2
		14	3	2					18	4	2
		14	3	2					18	4	2
		14	3	2					18	4	2
		14	3	2					18	4	2
		14	3	2					18	4	2
		15	3	2					18	4	2
		15	3	2					18	4	2
		15	3	2					18	4	2
		15	3	2					18	4	2
		15	3	2					18	4	2
		15	3	2					18	4	2
		15	3	2					18	4	2
		15	3	2					18	4	2
		15	3	2					18	4	2
		15	3	2					18	4	2
		15	3	2					18	4	2
		15	3	2					18	4	2
		15	3	2					18	4	2
		15	3	2					18	4	2
		15	3	2					18	4	2
		15	3	2					18	4	2
		15	3	2					18	4	2
		15	3	2					18	4	2
		15	3	2					18	4	2
		15	3	2					18	4	2
		15	3	2					18	4	2
		15	3	2					18	4	2
		15	3	2					18	4	2
		15	3	2					18	4	2
		16	3	2					19	4	2
		17	3	2					19	4	2
		17	3	2					19	4	2
		17	3	2					19	4	2
		17	3	2					19	4	2
		18	3	2					19	4	2
		18	3	2					19	4	2
		20	3	2					13	1	3
		10	4	2					13	1	3
		10	4	2					13	1	3
		10	4	2					13	1	3
		10	4	2					13	1	3
		10	4	2					13	1	3
		10	4	2					13	1	3
		11	4	2					13	1	3
		11	4	2					13	1	3
		11	4	2					13	1	3
		11	4	2					13	1	3
		11	4	2					13	1	3
		11	4	2					13	1	3
		11	4	2					13	1	3
		11	4	2					13	1	3
		11	4	2					13	1	3
		11	4	2					13	1	3
		11	4	2					13	1	3
		11	4	2					13	1	3
[truncated: 18,597 more rows]

## Sheet: Larval growth_small-scale
Small-scale trial 1								Small-scale trial 2
Dry Substrate List		Larvae	Prepupae	Pupae	treatment			Dry Substrate List		Larvae	Prepupae	Pupae	treatment
1 = CON		0.1385	0.1372	0.1154	1			1 = CON		0.2222	0.1735	0.1464	1
2 = 25% rice husk (25%RH)		0.1685	0.122	0.1012	1			2 = 5% rice husk (5%RH)		0.1983	0.1879	0.1585	1
3 = 50% rice husk (50%RH)		0.1431	0.1209	0.0894	1			3 = 10% rice husk (10%RH)		0.2319	0.1477	0.1273	1
4 = 25% rice husk ash (25%RHA)		0.184	0.1465	0.1298	1			4 = 15% rice husk (15%RH)		0.188	0.1617	0.1268	1
5 = 50% rice husk ash (50%RHA)		0.1723	0.1537	0.1263	1			5 = 5% rice husk ash (5%RHA)		0.1501	0.2097	0.1358	1
6 = 25% rubberwood sawdust (25%RSD)		0.1442	0.149	0.1539	1			6 = 10% rice husk ash (10%RHA)		0.1734	0.178	0.1778	1
7 = 50% rubberwood sawdust (50%RSD)		0.1942	0.1321	0.1276	1			7 = 15% rice husk ash (15%RHA)		0.1854	0.1771	0.1374	1
8 = 25% rice bran (25%RB)		0.1729	0.13	0.1064	1			8 = 5% rubberwood sawdust (5%RSD)		0.1909	0.1464	0.1165	1
9 = 50% rice bran (50%RB)		0.1344	0.134	0.0957	1			9 = 10% rubberwood sawdust (10%RSD)		0.2713	0.176	0.1751	1
10 = 25% spent coffee ground (25%SCG)		0.1914	0.1558	0.1217	1			10 = 15% rubberwood sawdust (15%RSD)		0.2608	0.1437	0.1488	1
11 = 50% spent coffee ground (50%SCG)		0.1416	0.1083	0.096	1			11 = 5% rice bran (5%RB)		0.2192	0.1894	0.152	1
12 = 25% coconut coir (25%CC)		0.1702	0.103	0.1437	1			12 = 10% rice bran (10%RB)		0.3454	0.1718	0.1542	1
13 = 50% coconut coir (50%CC)		0.1276	0.1507	0.0832	1			13 = 15% rice bran (15%RB)		0.3204	0.162	0.1516	1
		0.1852	0.2267	0.1009	1			14 = 5% spent coffee ground (5%SCG)		0.2725	0.1624	0.1256	1
		0.1576	0.1661	0.1365	1			15 = 10% spent coffee ground (10%SCG)		0.3227	0.1811	0.1448	1
		0.14	0.1952	0.1308	1			16 = 15% spent coffee ground (15%SCG)		0.3236	0.1698	0.1307	1
		0.1476	0.152	0.103	1			17 = 5% coconut coir (5%CC)		0.3321	0.1648	0.1591	1
		0.1511	0.1513	0.0779	1			18 = 10% coconut coir (10%CC)		0.3221	0.1666	0.1469	1
		0.1445	0.1996	0.0952	1			19 = 15% coconut coir (15%CC)		0.3319	0.1355	0.1678	1
		0.1801	0.1914	0.115	1					0.4054	0.188	0.1653	1
		0.1539	0.17	0.086	1					0.3362	0.1612	0.1509	1
		0.1763	0.1241	0.1142	1					0.3023	0.1724	0.1291	1
		0.1402	0.156	0.1003	1					0.3264	0.1476	0.1562	1
		0.1334	0.172	0.0859	1					0.3952	0.2044	0.1502	1
		0.1528	0.132	0.0969	1					0.3203	0.1617	0.1304	1
		0.1952	0.1442	0.0825	1					0.3816	0.1544	0.1243	1
		0.1226	0.142	0.1022	1					0.2851	0.1589	0.1548	1
		0.1432	0.133	0.1036	1					0.403	0.1582	0.1619	1
		0.1509	0.1423	0.1409	1					0.3203	0.1801	0.1534	1
		0.1526	0.1164	0.1035	1					0.3468	0.178	0.1381	1
		0.1155	0.1569	0.0824	1					0.3841	0.1632	0.1797	1
		0.1576	0.1943	0.102	1					0.3579	0.1705	0.1512	1
		0.1572	0.1742	0.1064	1					0.3402	0.1796	0.1693	1
		0.1683	0.1464	0.1292	1					0.3161	0.1781	0.1276	1
		0.1229	0.143	0.1073	1					0.3995	0.1599	0.13	1
		0.1663	0.1549	0.0869	1					0.3637	0.2074	0.1513	1
		0.2224	0.1762	0.1212	1					0.3926	0.2181	0.1296	1
		0.1246	0.163	0.0894	1					0.3832	0.2067	0.1697	1
		0.2483	0.1442	0.0989	1					0.3937	0.2109	0.1562	1
		0.14148	0.1632	0.0937	1					0.3873	0.2101	0.1516	1
		0.0813	0.1151	0.1153	2					0.2033	0.1569	0.1233	2
		0.1945	0.1051	0.1101	2					0.22	0.1165	0.1738	2
		0.1915	0.1163	0.1115	2					0.224	0.1443	0.1549	2
		0.209	0.1335	0.1118	2					0.2489	0.1529	0.1563	2
		0.1764	0.1322	0.0895	2					0.2132	0.1343	0.1189	2
		0.1273	0.1287	0.1104	2					0.2251	0.1337	0.131	2
		0.1747	0.1572	0.0868	2					0.2438	0.1024	0.1166	2
		0.2132	0.152	0.1229	2					0.1668	0.1461	0.1498	2
		0.1943	0.15594	0.1054	2					0.2287	0.1505	0.1507	2
		0.1896	0.1224	0.1177	2					0.2005	0.1513	0.1304	2
		0.1693	0.1136	0.0749	2					0.1862	0.1249	0.1214	2
		0.1611	0.2152	0.1149	2					0.2453	0.1568	0.1634	2
		0.182	0.117	0.1063	2					0.2305	0.1572	0.1371	2
		0.1721	0.1075	0.0758	2					0.2	0.1358	0.1208	2
		0.1797	0.1083	0.1353	2					0.1951	0.1622	0.1355	2
		0.1702	0.1982	0.1153	2					0.2001	0.1502	0.144	2
		0.1941	0.1016	0.1092	2					0.1641	0.1126	0.1638	2
		0.1494	0.1594	0.095	2					0.1302	0.146	0.1634	2
		0.2258	0.1216	0.1037	2					0.239	0.1605	0.1548	2
		0.1826	0.1488	0.1317	2					0.1787	0.142	0.1467	2
		0.1613	0.0845	0.1047	2					0.1844	0.1443	0.1345	2
		0.1505	0.1456	0.1036	2					0.1184	0.1381	0.1643	2
		0.1748	0.1352	0.1143	2					0.231	0.1352	0.1454	2
		0.181	0.1582	0.1411	2					0.221	0.1222	0.1174	2
		0.175	0.1094	0.1254	2					0.2226	0.1417	0.1316	2
		0.178	0.1007	0.0998	2					0.2069	0.1422	0.1386	2
		0.1947	0.114	0.0999	2					0.283	0.1314	0.1265	2
		0.1581	0.1823	0.0864	2					0.2206	0.123	0.1516	2
		0.153	0.0945	0.1049	2					0.1778	0.1354	0.1537	2
		0.1746	0.112	0.1136	2					0.2239	0.1286	0.1121	2
		0.1656	0.1242	0.1081	2					0.217	0.1372	0.1406	2
		0.2185	0.1722	0.1229	2					0.1615	0.107	0.1967	2
		0.1529	0.1674	0.1177	2					0.2124	0.1069	0.1338	2
		0.1613	0.1662	0.1066	2					0.1321	0.1291	0.1354	2
		0.2015	0.172	0.1114	2					0.1523	0.13	0.1424	2
		0.1797	0.112	0.1127	2					0.2144	0.1359	0.1295	2
		0.164	0.1037	0.1382	2					0.2431	0.1456	0.1456	2
		0.164	0.1569	0.0957	2					0.2026	0.146	0.1168	2
		0.1762	0.1942	0.1325	2					0.1905	0.1492	0.1183	2
		0.1596	0.1852	0.122	2					0.2103	0.1381	0.1355	2
		0.0832	0.0971	0.1234	3					0.3124	0.2302	0.1411	3
		0.102	0.0806	0.0821	3					0.3715	0.2141	0.1447	3
		0.1097	0.1313	0.058	3					0.4002	0.1821	0.1457	3
		0.1249	0.0885	0.0962	3					0.3438	0.1934	0.1246	3
		0.108	0.1132	0.0687	3					0.416	0.202	0.1427	3
		0.1311	0.0903	0.0682	3					0.3557	0.2002	0.1408	3
		0.119	0.0784	0.0582	3					0.3316	0.186	0.0976	3
		0.1007	0.1566	0.0792	3					0.4153	0.2014	0.1636	3
		0.1144	0.0852	0.0678	3					0.372	0.2314	0.1004	3
		0.1005	0.1088	0.0769	3					0.3845	0.1837	0.1551	3
		0.1048	0.0865	0.0732	3					0.3903	0.1669	0.148	3
		0.1136	0.0887	0.0723	3					0.3382	0.1791	0.123	3
		0.1055	0.0949	0.0781	3					0.3938	0.1727	0.1468	3
		0.0853	0.0957	0.086	3					0.3619	0.1627	0.1788	3
		0.0872	0.09	0.0504	3					0.3191	0.2194	0.1075	3
		0.1252	0.0761	0.0701	3					0.293	0.2442	0.1403	3
		0.1096	0.1224	0.0715	3					0.3943	0.1973	0.1338	3
		0.1127	0.1029	0.0985	3					0.3184	0.1625	0.1417	3
		0.113	0.097	0.0832	3					0.374	0.1971	0.1444	3
		0.1232	0.0824	0.0703	3					0.324	0.2588	0.1456	3
		0.0935	0.1046	0.109	3					0.3236	0.2129	0.1382	3
		0.1172	0.1142	0.0815	3					0.3895	0.1679	0.1384	3
		0.1225	0.0762	0.119	3					0.3406	0.1688	0.1519	3
		0.0839	0.0783	0.0728	3					0.3558	0.2423	0.1196	3
		0.0827	0.1766	0.0573	3					0.3262	0.1965	0.1451	3
		0.1181	0.11	0.0946	3					0.341	0.1414	0.1544	3
		0.0938	0.0933	0.0804	3					0.34	0.2096	0.1556	3
		0.0962	0.1236	0.0631	3					0.3642	0.2201	0.1567	3
		0.0672	0.1291	0.1039	3					0.4055	0.211	0.1344	3
		0.1183	0.1069	0.0973	3					0.3672	0.231	0.1216	3
		0.11	0.0954	0.0982	3					0.3308	0.2219	0.1372	3
		0.1132	0.1101	0.083	3					0.3032	0.1988	0.1102	3
		0.1277	0.0943	0.0722	3					0.3171	0.23	0.166	3
		0.0956	0.1223	0.0836	3					0.2617	0.2165	0.1295	3
		0.0779	0.0871	0.0894	3					0.384	0.1984	0.1516	3
		0.116	0.1084	0.0745	3					0.3739	0.1896	0.1416	3
		0.0536	0.0936	0.0766	3					0.2939	0.1664	0.1505	3
		0.0691	0.0822	0.0955	3					0.381	0.2341	0.1598	3
		0.1169	0.0748	0.0538	3					0.3613	0.2112	0.1581	3
		0.11	0.1083	0.0581	3					0.33	0.2147	0.1386	3
		0.1172	0.0611	0.0582	4					0.2242	0.1223	0.1177	4
		0.1532	0.067	0.0716	4					0.1912	0.1072	0.1212	4
		0.1104	0.1026	0.0604	4					0.1707	0.1681	0.1215	4
		0.1263	0.0737	0.0725	4					0.1902	0.1358	0.1395	4
		0.1056	0.0923	0.0729	4					0.2252	0.1224	0.1124	4
		0.1024	0.1117	0.0779	4					0.2206	0.1242	0.1094	4
		0.0993	0.1126	0.1269	4					0.1801	0.1317	0.1012	4
		0.1245	0.0735	0.0704	4					0.1898	0.1239	0.1144	4
		0.1343	0.0995	0.1269	4					0.1817	0.1305	0.1456	4
		0.1001	0.049	0.0821	4					0.1622	0.1193	0.1003	4
		0.1136	0.109	0.0683	4					0.2231	0.1273	0.139	4
		0.1034	0.1211	0.0674	4					0.197	0.1217	0.1959	4
		0.1242	0.0991	0.0632	4					0.2228	0.1357	0.1225	4
		0.0969	0.1035	0.0782	4					0.2341	0.1364	0.1619	4
		0.1072	0.0875	0.056	4					0.154	0.1205	0.1077	4
		0.11	0.1097	0.0721	4					0.2394	0.1361	0.1623	4
		0.0937	0.0926	0.0776	4					0.2358	0.1445	0.126	4
		0.0749	0.1063	0.0694	4					0.2032	0.1431	0.0856	4
		0.0962	0.0999	0.0737	4					0.2084	0.109	0.1517	4
		0.1147	0.112	0.0784	4					0.233	0.111	0.1544	4
		0.1003	0.0921	0.0722	4					0.2479	0.1218	0.1269	4
		0.1129	0.113	0.0639	4					0.2455	0.1135	0.1476	4
		0.081	0.112	0.0738	4					0.2727	0.1204	0.1116	4
		0.1064	0.1021	0.0695	4					0.273	0.1249	0.1364	4
		0.099	0.0956	0.0671	4					0.2035	0.1174	0.17	4
		0.1196	0.1172	0.0575	4					0.2495	0.1223	0.1189	4
		0.133	0.1132	0.0734	4					0.24	0.1283	0.1009	4
		0.0916	0.0712	0.0725	4					0.2133	0.1033	0.1182	4
		0.1164	0.08	0.1369	4					0.2031	0.1331	0.1283	4
		0.09	0.0711	0.0738	4					0.3124	0.1249	0.1105	4
		0.103	0.0921	0.0603	4					0.2411	0.1379	0.1327	4
		0.1147	0.1124	0.0773	4					0.2194	0.1463	0.1126	4
		0.1029	0.121	0.0689	4					0.2462	0.1176	0.1237	4
		0.1054	0.0812	0.0755	4					0.1945	0.1238	0.1119	4
		0.1215	0.0721	0.0683	4					0.1956	0.1451	0.1133	4
		0.0829	0.0821	0.076	4					0.1753	0.1049	0.119	4
		0.1163	0.0912	0.0648	4					0.2203	0.1421	0.1116	4
		0.102	0.1123	0.0738	4					0.2106	0.1089	0.1224	4
		0.0956	0.112	0.0594	4					0.2216	0.1041	0.1346	4
		0.1085	0.1044	0.0679	4					0.2364	0.1055	0.105	4
		0.0692	0.0696	0.0395	5					0.2252	0.1648	0.1145	5
		0.0693	0.0836	0.0799	5					0.2341	0.1483	0.1407	5
		0.0688	0.0433	0.0536	5					0.2021	0.1494	0.1389	5
		0.0747	0.0702	0.0376	5					0.1995	0.1461	0.1451	5
		0.0554	0.034	0.0396	5					0.27	0.1301	0.1374	5
		0.0667	0.0675	0.0412	5					0.2668	0.1218	0.1416	5
		0.0761	0.0335	0.04223	5					0.2661	0.139	0.13	5
		0.0554	0.0713	0.0317	5					0.2632	0.1544	0.1139	5
		0.0875	0.067	0.0347	5					0.1751	0.146	0.1257	5
		0.0732	0.0771	0.045	5					0.2147	0.1206	0.1226	5
		0.0774	0.0685	0.0337	5					0.2425	0.1638	0.1445	5
		0.0752	0.0772	0.039	5					0.2596	0.1219	0.1081	5
		0.0718	0.0573	0.0371	5					0.2642	0.1393	0.1493	5
		0.0754	0.0641	0.0434	5					0.2633	0.1294	0.1444	5
		0.0713	0.0588	0.0385	5					0.226	0.1295	0.1296	5
		0.0672	0.0622	0.0408	5					0.2347	0.1603	0.13	5
		0.0854	0.0757	0.0355	5					0.2617	0.1305	0.1821	5
		0.0782	0.0513	0.0419	5					0.27	0.1538	0.1261	5
		0.081	0.0674	0.0446	5					0.2531	0.1421	0.1396	5
		0.0576	0.0772	0.0398	5					0.2277	0.135	0.1542	5
		0.0451	0.032	0.0478	5					0.2391	0.1624	0.1672	5
		0.0821	0.0457	0.044	5					0.2648	0.1479	0.1283	5
		0.061	0.0664	0.0366	5					0.296	0.1709	0.1184	5
		0.065	0.0542	0.0406	5					0.2385	0.1333	0.117	5
		0.0669	0.0673	0.0466	5					0.3232	0.153	0.1245	5
		0.0653	0.0671	0.0455	5					0.2772	0.1488	0.1348	5
		0.0729	0.0712	0.0395	5					0.3018	0.1245	0.1319	5
		0.0602	0.0633	0.0348	5					0.3045	0.1326	0.1301	5
		0.0573	0.0432	0.0403	5					0.2784	0.1353	0.1299	5
		0.0637	0.0522	0.0406	5					0.3322	0.1496	0.1224	5
		0.0703	0.0329	0.0335	5					0.31	0.1355	0.1368	5
		0.074	0.0831	0.0423	5					0.3086	0.1355	0.148	5
		0.0788	0.0779	0.0331	5					0.267	0.1286	0.1524	5
		0.0653	0.069	0.0395	5					0.2697	0.1535	0.15	5
		0.0465	0.0541	0.0376	5					0.3651	0.137	0.1409	5
		0.0658	0.074	0.0309	5					0.1924	0.1447	0.1433	5
		0.0639	0.0301	0.0313	5					0.2394	0.1462	0.1398	5
		0.0701	0.0621	0.0309	5					0.1505	0.1172	0.1139	5
		0.0436	0.0729	0.0374	5					0.2492	0.1315	0.1293	5
		0.0465	0.0511	0.0359	5					0.1873	0.1332	0.1179	5
		0.0926	0.0941	0.09009	6					0.2146	0.1435	0.1133	6
		0.0906	0.0885	0.0859	6					0.2371	0.1271	0.1155	6
		0.0897	0.0953	0.059	6					0.1836	0.1312	0.129	6
		0.1007	0.0926	0.0813	6					0.2089	0.1259	0.1478	6
		0.1049	0.0837	0.0752	6					0.1865	0.1317	0.1454	6
		0.1162	0.0879	0.0572	6					0.1907	0.1273	0.1236	6
		0.1052	0.0831	0.0704	6					0.1924	0.1408	0.1155	6
		0.1124	0.0872	0.0897	6					0.2246	0.1327	0.1275	6
		0.1113	0.0769	0.0705	6					0.219	0.1518	0.1504	6
		0.1107	0.0989	0.0622	6					0.2078	0.1459	0.1361	6
		0.1124	0.0974	0.0633	6					0.1834	0.1276	0.1045	6
		0.1434	0.0817	0.0897	6					0.2032	0.1597	0.1203	6
		0.1096	0.0959	0.0562	6					0.2222	0.1303	0.1172	6
		0.1102	0.0992	0.0818	6					0.3432	0.14	0.1519	6
		0.1388	0.0901	0.0755	6					0.1785	0.1485	0.115	6
		0.0961	0.0791	0.0773	6					0.1778	0.1529	0.127	6
		0.0896	0.0816	0.078	6					0.2091	0.1458	0.1267	6
		0.1145	0.0674	0.0731	6					0.2078	0.1547	0.1242	6
		0.1075	0.1004	0.0759	6					0.1932	0.1547	0.1382	6
		0.1014	0.0837	0.0735	6					0.1739	0.1305	0.1138	6
		0.1081	0.0973	0.0493	6					0.2062	0.1381	0.1144	6
		0.0859	0.0836	0.067	6					0.1977	0.1355	0.1436	6
		0.0915	0.0868	0.0589	6					0.2303	0.1374	0.1568	6
		0.087	0.097	0.0627	6					0.1822	0.1216	0.1239	6
		0.0452	0.0974	0.0806	6					0.1724	0.1248	0.1366	6
		0.1087	0.0862	0.0754	6					0.1642	0.1624	0.121	6
		0.0915	0.0929	0.0752	6					0.2217	0.1347	0.1361	6
		0.0834	0.0956	0.071	6					0.1829	0.1326	0.1393	6
		0.104	0.1095	0.0848	6					0.2155	0.1197	0.1162	6
		0.1483	0.1025	0.09057	6					0.2389	0.1253	0.1274	6
		0.0982	0.0826	0.0717	6					0.2078	0.119	0.1151	6
		0.1022	0.0921	0.0792	6					0.1979	0.1236	0.122	6
		0.1373	0.0849	0.0624	6					0.2276	0.1571	0.1518	6
		0.1586	0.0852	0.0657	6					0.219	0.1423	0.1303	6
		0.1103	0.1011	0.0583	6					0.2116	0.131	0.1299	6
		0.1346	0.0807	0.0876	6					0.2518	0.1234	0.1063	6
		0.1285	0.0983	0.0816	6					0.2407	0.1445	0.1231	6
		0.1194	0.0979	0.0738	6					0.2371	0.1346	0.145	6
		0.1275	0.1013	0.0461	6					0.2539	0.1125	0.1242	6
		0.0972	0.0735	0.0785	6					0.2447	0.1408	0.1663	6
		0.0951	0.0525	0.0576	7					0.2118	0.1359	0.1227	7
		0.0539	0.0544	0.0546	7					0.2243	0.1294	0.1299	7
		0.0796	0.0596	0.0523	7					0.2214	0.1115	0.1192	7
		0.0769	0.0519	0.0535	7					0.2386	0.1416	0.1106	7
		0.0884	0.0532	0.0622	7					0.2388	0.1266	0.1296	7
		0.0589	0.0817	0.0603	7					0.2357	0.1007	0.1131	7
		0.0723	0.0607	0.0451	7					0.1839	0.141	0.1418	7
		0.0835	0.0589	0.0476	7					0.2197	0.122	0.1065	7
		0.0892	0.0624	0.0631	7					0.2252	0.1004	0.126	7
		0.0735	0.0727	0.0486	7					0.2456	0.1358	0.1144	7
		0.0961	0.0674	0.0303	7					0.2283	0.118	0.1294	7
		0.0887	0.0442	0.063	7					0.1726	0.1298	0.1206	7
		0.0635	0.0576	0.0499	7					0.2139	0.1126	0.0883	7
		0.0749	0.0642	0.0507	7					0.2035	0.1261	0.1235	7
		0.0686	0.0761	0.0565	7					0.1955	0.1103	0.1126	7
		0.0767	0.0986	0.0554	7					0.2089	0.1303	0.1198	7
		0.0744	0.0751	0.0744	7					0.2107	0.1371	0.1004	7
		0.0619	0.0589	0.0521	7					0.2321	0.1153	0.1349	7
		0.0533	0.0811	0.0586	7					0.1957	0.1149	0.1351	7
		0.0871	0.1173	0.0602	7					0.1998	0.1223	0.1167	7
		0.105	0.0644	0.0558	7					0.1924	0.1328	0.1118	7
		0.0501	0.0951	0.0506	7					0.1589	0.11	0.1221	7
		0.0909	0.0671	0.0442	7					0.1985	0.1226	0.1343	7
		0.0655	0.0691	0.0514	7					0.2094	0.1203	0.1154	7
		0.0741	0.0693	0.0534	7					0.1988	0.1204	0.1201	7
		0.0584	0.0567	0.0532	7					0.1857	0.1101	0.1514	7
		0.0762	0.052	0.0595	7					0.1624	0.1078	0.0893	7
		0.0584	0.0812	0.0535	7					0.1827	0.1212	0.1047	7
		0.0603	0.0711	0.051	7					0.1652	0.0926	0.1047	7
		0.0937	0.0673	0.0304	7					0.1768	0.1246	0.1169	7
		0.0654	0.0523	0.0464	7					0.1715	0.1246	0.1222	7
		0.0837	0.0591	0.0475	7					0.1831	0.1188	0.1236	7
		0.0586	0.0542	0.0547	7					0.2024	0.1281	0.1262	7
		0.0616	0.0611	0.1033	7					0.1758	0.1208	0.1246	7
		0.0774	0.0724	0.0614	7					0.1809	0.1231	0.1288	7
		0.0829	0.0821	0.0548	7					0.2188	0.1136	0.1025	7
		0.0729	0.0691	0.0534	7					0.1935	0.0844	0.1191	7
		0.0574	0.0511	0.0459	7					0.2158	0.1205	0.1233	7
		0.0465	0.0899	0.0596	7					0.1965	0.0992	0.1106	7
		0.0752	0.1103	0.0556	7					0.2652	0.1214	0.107	7
		0.1341	0.1155	0.1263	8					0.1943	0.1383	0.1649	8
		0.1058	0.1174	0.1225	8					0.1825	0.1462	0.1213	8
		0.1697	0.1398	0.1041	8					0.1721	0.1008	0.1379	8
		0.139	0.115	0.0984	8					0.1645	0.1487	0.1282	8
		0.1227	0.1305	0.0939	8					0.1784	0.1503	0.1169	8
		0.1445	0.103	0.1059	8					0.2019	0.1318	0.1161	8
		0.1379	0.1252	0.1262	8					0.2113	0.1503	0.1668	8
		0.163	0.1234	0.0976	8					0.2346	0.1144	0.1233	8
		0.1412	0.1143	0.1149	8					0.2111	0.1628	0.1645	8
		0.1311	0.1138	0.1202	8					0.261	0.1557	0.132	8
		0.1259	0.1063	0.0962	8					0.1945	0.1224	0.139	8
		0.1458	0.1283	0.0725	8					0.1798	0.1297	0.1237	8
		0.1417	0.165	0.0984	8					0.167	0.1243	0.1472	8
		0.087	0.1353	0.0879	8					0.2034	0.127	0.1622	8
		0.1447	0.0974	0.1046	8					0.2103	0.109	0.1454	8
		0.1444	0.1022	0.0851	8					0.1871	0.1346	0.1511	8
		0.1432	0.1025	0.102	8					0.1942	0.157	0.1378	8
		0.1193	0.1036	0.0902	8					0.1732	0.131	0.1171	8
		0.1477	0.1427	0.0884	8					0.1693	0.1094	0.1179	8
		0.1385	0.1304	0.1025	8					0.1798	0.1822	0.1546	8
		0.1479	0.116	0.1074	8					0.1875	0.1427	0.1064	8
		0.1178	0.124	0.1147	8					0.2101	0.1092	0.1519	8
		0.1431	0.123	0.1079	8					0.1697	0.1523	0.1212	8
		0.1208	0.0971	0.0963	8					0.1812	0.1228	0.1324	8
		0.1483	0.1322	0.0865	8					0.1745	0.1644	0.1298	8
		0.1014	0.1291	0.0961	8					0.1649	0.1076	0.1301	8
		0.1287	0.1227	0.0876	8					0.1879	0.1357	0.1507	8
		0.149	0.14754	0.1097	8					0.18	0.1373	0.1272	8
		0.1184	0.1437	0.1045	8					0.1891	0.1519	0.1339	8
		0.1015	0.1156	0.1052	8					0.165	0.125	0.1525	8
		0.1168	0.1172	0.1066	8					0.1731	0.1438	0.1525	8
		0.1223	0.1204	0.0962	8					0.1945	0.1463	0.1354	8
		0.1227	0.1126	0.1156	8					0.1934	0.1474	0.139	8
		0.123	0.117	0.1178	8					0.1955	0.1738	0.1333	8
		0.1025	0.1157	0.1164	8					0.1879	0.1441	0.1432	8
		0.1162	0.1062	0.1041	8					0.1843	0.1378	0.1367	8
		0.0791	0.1394	0.1074	8					0.1754	0.1471	0.1181	8
		0.1247	0.1142	0.1176	8					0.1984	0.1213	0.1143	8
		0.129	0.1295	0.101	8					0.1549	0.1492	0.1344	8
		0.1105	0.099	0.105	8					0.1496	0.1351	0.1396	8
		0.0696	0.0788	0.0455	9					0.1681	0.1382	0.1123	9
		0.0871	0.0861	0.0524	9					0.1897	0.1205	0.1038	9
		0.0559	0.0623	0.0669	9					0.2491	0.1429	0.1392	9
		0.1031	0.0837	0.0523	9					0.1805	0.1416	0.123	9
		0.0822	0.074	0.0706	9					0.2305	0.1471	0.1332	9
		0.0974	0.0752	0.0512	9					0.1971	0.121	0.1173	9
		0.0567	0.1004	0.0446	9					0.197	0.1353	0.1218	9
		0.0894	0.13	0.0495	9					0.1994	0.1383	0.1313	9
		0.1053	0.0711	0.061	9					0.1881	0.1147	0.1057	9
		0.0958	0.0729	0.0502	9					0.2043	0.1296	0.1339	9
		0.0622	0.0896	0.0611	9					0.1916	0.1294	0.1321	9
		0.0725	0.0653	0.0603	9					0.197	0.118	0.1337	9
		0.0951	0.0642	0.0505	9					0.1812	0.1201	0.1346	9
		0.0871	0.073	0.0673	9					0.2422	0.1524	0.128	9
		0.0787	0.0721	0.0716	9					0.184	0.1235	0.1383	9
		0.0843	0.11	0.0506	9					0.1882	0.1436	0.1299	9
		0.1037	0.0831	0.0477	9					0.2115	0.1231	0.1364	9
		0.0802	0.0761	0.0604	9					0.2199	0.1315	0.1368	9
		0.0733	0.0819	0.0635	9					0.1967	0.121	0.1192	9
		0.0797	0.0829	0.0464	9					0.1931	0.1187	0.1469	9
		0.073	0.076	0.0653	9					0.1875	0.1344	0.1135	9
		0.0792	0.1131	0.0534	9					0.1744	0.1279	0.1137	9
		0.0707	0.0944	0.0603	9					0.1949	0.1288	0.116	9
		0.0705	0.104	0.0739	9					0.2113	0.1427	0.1335	9
		0.0714	0.12	0.0572	9					0.191	0.1224	0.128	9
		0.0831	0.1072	0.0573	9					0.2128	0.1289	0.1278	9
		0.0844	0.1069	0.0443	9					0.187	0.1417	0.125	9
		0.087	0.0659	0.0597	9					0.2254	0.1383	0.0867	9
		0.0654	0.0817	0.0561	9					0.185	0.1254	0.147	9
		0.0812	0.0732	0.0566	9					0.1768	0.1036	0.1158	9
		0.0674	0.091	0.0436	9					0.2316	0.1234	0.1298	9
		0.043	0.0602	0.0368	9					0.2244	0.1218	0.1143	9
		0.0654	0.0723	0.0556	9					0.2037	0.1361	0.127	9
		0.0566	0.0812	0.0506	9					0.2255	0.1487	0.1371	9
		0.0429	0.0659	0.0362	9					0.1962	0.1157	0.1105	9
		0.0681	0.0761	0.0524	9					0.2298	0.1444	0.1436	9
		0.0686	0.123	0.0438	9					0.2116	0.137	0.1378	9
		0.0537	0.0931	0.0556	9					0.2059	0.1446	0.1494	9
		0.0781	0.0721	0.0357	9					0.2298	0.1223	0.139	9
		0.0804	0.0762	0.0388	9					0.2001	0.1351	0.133	9
		0.099	0.1322	0.1239	10					0.182	0.1247	0.1264	10
		0.1216	0.0873	0.0835	10					0.1455	0.1395	0.1128	10
		0.1277	0.1126	0.1051	10					0.1812	0.1116	0.1293	10
		0.1492	0.1121	0.1051	10					0.1791	0.1226	0.1296	10
		0.127	0.113	0.12	10					0.1737	0.1225	0.1202	10
		0.1486	0.1753	0.108	10					0.1999	0.1034	0.1146	10
		0.1125	0.1182	0.1126	10					0.1583	0.1216	0.1151	10
		0.1107	0.1079	0.081	10					0.2088	0.1246	0.1396	10
		0.1922	0.1204	0.0881	10					0.1713	0.1242	0.1259	10
		0.1449	0.1224	0.1138	10					0.1556	0.1292	0.1009	10
		0.1197	0.1212	0.0807	10					0.1653	0.1098	0.101	10
		0.1186	0.1136	0.0917	10					0.1558	0.087	0.1317	10
		0.1319	0.1141	0.1018	10					0.1249	0.1054	0.1296	10
		0.1086	0.1101	0.144	10					0.1744	0.1284	0.1183	10
		0.1033	0.1093	0.1063	10					0.1282	0.113	0.0932	10
		0.1202	0.0884	0.0801	10					0.1785	0.1231	0.1158	10
		0.174	0.0926	0.0835	10					0.1583	0.126	0.1368	10
		0.1555	0.1271	0.1215	10					0.1669	0.1116	0.106	10
		0.102	0.1217	0.1077	10					0.2034	0.1049	0.1151	10
		0.093	0.1143	0.0828	10					0.152	0.136	0.1221	10
		0.1246	0.121	0.0827	10					0.1829	0.1522	0.1139	10
		0.1254	0.1138	0.1003	10					0.1697	0.1342	0.1283	10
		0.1216	0.1169	0.0929	10					0.1955	0.0807	0.0891	10
		0.1218	0.0993	0.0919	10					0.1608	0.1172	0.1111	10
		0.1917	0.1087	0.1021	10					0.2081	0.1075	0.1152	10
		0.08931	0.1248	0.0861	10					0.1678	0.11	0.0825	10
		0.1775	0.124	0.0813	10					0.2269	0.114	0.1385	10
		0.1425	0.1116	0.0858	10					0.1668	0.137	0.1402	10
		0.1241	0.0978	0.1079	10					0.144	0.0748	0.1286	10
		0.15554	0.1183	0.0948	10					0.2062	0.1123	0.1201	10
		0.1991	0.1756	0.0577	10					0.1801	0.142	0.1114	10
		0.1635	0.0967	0.0978	10					0.1608	0.1173	0.1074	10
		0.1545	0.1192	0.0708	10					0.1581	0.1038	0.1129	10
		0.1292	0.1234	0.0826	10					0.1829	0.0857	0.1107	10
		0.1136	0.1214	0.0798	10					0.1525	0.131	0.1256	10
		0.1529	0.1585	0.0898	10					0.1512	0.0855	0.1207	10
		0.115	0.0954	0.0773	10					0.2214	0.142	0.1217	10
		0.1316	0.1945	0.0678	10					0.1647	0.1298	0.1138	10
		0.1165	0.0912	0.0958	10					0.2256	0.14	0.1221	10
		0.1176	0.1165	0.0964	10					0.1992	0.0908	0.121	10
		0.1124	0.0846	0.0395	11					0.2466	0.1815	0.1544	11
		0.0793	0.0723	0.0799	11					0.2176	0.1835	0.1451	11
		0.1183	0.0945	0.0536	11					0.2493	0.2067	0.1568	11
		0.0924	0.1164	0.0376	11					0.2167	0.1563	0.1816	11
		0.0967	0.1205	0.0326	11					0.2252	0.1988	0.2053	11
		0.1168	0.0969	0.0412	11					0.224	0.193	0.1998	11
		0.1051	0.1136	0.0422	11					0.2136	0.1968	0.1636	11
		0.086	0.1077	0.0317	11					0.2111	0.1832	0.1544	11
		0.0874	0.0867	0.0347	11					0.2187	0.145	0.2093	11
		0.0838	0.1136	0.045	11					0.2072	0.1614	0.1555	11
		0.1042	0.0739	0.0337	11					0.2004	0.1942	0.1767	11
		0.0912	0.0755	0.039	11					0.1667	0.1761	0.1944	11
		0.0906	0.0939	0.0371	11					0.2118	0.1675	0.1643	11
		0.1132	0.1061	0.0434	11					0.2183	0.177	0.1697	11
		0.0948	0.0998	0.0385	11					0.2204	0.1752	0.2226	11
		0.0801	0.1178	0.0408	11					0.1875	0.175	0.1535	11
		0.0804	0.1205	0.0355	11					0.2508	0.1538	0.1794	11
		0.097	0.0842	0.041	11					0.2256	0.2169	0.1538	11
		0.1185	0.124	0.0446	11					0.1992	0.1546	0.18	11
		0.105	0.0887	0.0398	11					0.1814	0.1592	0.1799	11
		0.1018	0.1064	0.0478	11					0.2037	0.1913	0.1886	11
		0.0943	0.1046	0.044	11					0.2264	0.1814	0.1759	11
		0.08	0.0899	0.0366	11					0.2545	0.1526	0.1561	11
		0.0801	0.089	0.04	11					0.2319	0.162	0.1906	11
		0.091	0.1029	0.0466	11					0.1902	0.1665	0.205	11
		0.106	0.0773	0.0455	11					0.2325	0.1814	0.2016	11
		0.0963	0.0699	0.0395	11					0.2499	0.1722	0.1812	11
		0.1088	0.0613	0.0348	11					0.2264	0.167	0.1541	11
		0.0722	0.121	0.0403	11					0.2284	0.1666	0.1879	11
		0.0978	0.1023	0.0406	11					0.2006	0.1348	0.1884	11
		0.1066	0.119	0.0355	11					0.2053	0.1642	0.1287	11
		0.0876	0.1201	0.0423	11					0.168	0.1794	0.2069	11
		0.087	0.1322	0.0331	11					0.1947	0.131	0.1986	11
		0.0704	0.1174	0.0395	11					0.12493	0.1611	0.1742	11
		0.0865	0.0891	0.0376	11					0.225	0.1722	0.1775	11
		0.0837	0.0901	0.0309	11					0.1991	0.1455	0.1968	11
		0.0813	0.1213	0.0313	11					0.2454	0.1674	0.1972	11
		0.0959	0.1003	0.0309	11					0.214	0.122	0.1793	11
		0.0663	0.1312	0.0374	11					0.2257	0.1776	0.173	11
		0.0943	0.1109	0.0359	11					0.1531	0.1512	0.1823	11
		0.1151	0.0918	0.0947	12					0.1781	0.1923	0.1174	12
		0.1133	0.0973	0.0822	12					0.2114	0.1595	0.1141	12
		0.1325	0.1264	0.1295	12					0.1822	0.1945	0.1146	12
		0.1207	0.0874	0.0864	12					0.2327	0.1715	0.0922	12
		0.1503	0.1068	0.0869	12					0.2023	0.1944	0.095	12
		0.1135	0.0985	0.0906	12					0.2344	0.2101	0.099	12
		0.1161	0.1005	0.079	12					0.1959	0.1953	0.0842	12
		0.1448	0.1057	0.0986	12					0.1925	0.2484	0.0821	12
		0.1402	0.1149	0.0855	12					0.2196	0.1935	0.1091	12
		0.1115	0.1018	0.0927	12					0.2142	0.1729	0.0869	12
		0.1328	0.0668	0.0812	12					0.2075	0.2116	0.0878	12
		0.1257	0.1208	0.0943	12					0.1936	0.1967	0.1058	12
		0.1106	0.1053	0.0873	12					0.2069	0.1992	0.0905	12
		0.1085	0.1036	0.0933	12					0.1779	0.1828	0.0904	12
		0.1245	0.0989	0.0777	12					0.2146	0.1978	0.1008	12
		0.1653	0.0816	0.0785	12					0.201	0.2113	0.1243	12
		0.1203	0.086	0.0886	12					0.116	0.2236	0.1154	12
		0.1298	0.119	0.0814	12					0.184	0.1929	0.1027	12
		0.1264	0.0992	0.0866	12					0.133	0.188	0.0799	12
		0.1065	0.1076	0.0914	12					0.2415	0.2344	0.1278	12
		0.1073	0.0996	0.0789	12					0.2349	0.1915	0.08	12
		0.0885	0.0682	0.0922	12					0.2581	0.1728	0.1172	12
		0.1739	0.0919	0.0787	12					0.2358	0.2049	0.0978	12
		0.1524	0.1045	0.1032	12					0.2049	0.2118	0.0995	12
		0.1122	0.0955	0.0872	12					0.2203	0.1551	0.09	12
		0.1081	0.0666	0.0858	12					0.1953	0.1772	0.0897	12
		0.1202	0.084	0.0852	12					0.1731	0.1735	0.1094	12
		0.1331	0.1058	0.1034	12					0.1884	0.1874	0.113	12
		0.1329	0.0862	0.0885	12					0.2027	0.2158	0.084	12
		0.12121	0.091	0.0799	12					0.1906	0.1989	0.0839	12
		0.1282	0.1014	0.1076	12					0.2047	0.2568	0.1041	12
		0.1318	0.099	0.0942	12					0.1993	0.1984	0.1078	12
		0.1351	0.0839	0.0812	12					0.1835	0.1982	0.0866	12
		0.0621	0.108	0.0945	12					0.1519	0.1848	0.1038	12
		0.0557	0.1158	0.0956	12					0.2029	0.1882	0.127	12
		0.1037	0.096	0.1053	12					0.2086	0.1927	0.1106	12
		0.1163	0.1228	0.0909	12					0.178	0.1804	0.091	12
		0.0843	0.1036	0.0704	12					0.1669	0.1974	0.0907	12
		0.1103	0.1003	0.0891	12					0.2345	0.2063	0.1376	12
		0.1609	0.0936	0.1015	12					0.1645	0.1928	0.1019	12
		0.0875	0.097	0.0584	13					0.1646	0.1833	0.1617	13
		0.089	0.0971	0.0538	13					0.2524	0.1738	0.1544	13
		0.078	0.0641	0.0573	13					0.2073	0.2204	0.1472	13
		0.0779	0.0808	0.064	13					0.2401	0.2404	0.1398	13
		0.0817	0.0829	0.0545	13					0.2088	0.211	0.1792	13
		0.1652	0.0874	0.0623	13					0.2521	0.2606	0.1795	13
		0.0882	0.0841	0.0596	13					0.2134	0.2483	0.1692	13
		0.0841	0.0938	0.0647	13					0.2051	0.192	0.1613	13
		0.0849	0.0723	0.055	13					0.1911	0.252	0.2007	13
		0.0949	0.0865	0.0675	13					0.2494	0.2137	0.1875	13
		0.0837	0.0828	0.065	13					0.2044	0.2106	0.1499	13
		0.0887	0.0776	0.0613	13					0.2048	0.1848	0.1207	13
		0.1025	0.0822	0.0638	13					0.2034	0.248	0.1887	13
		0.0988	0.1043	0.0725	13					0.2481	0.207	0.1571	13
		0.0882	0.083	0.0572	13					0.2917	0.1969	0.1849	13
		0.0925	0.093	0.0602	13					0.2482	0.1772	0.2023	13
		0.0902	0.094	0.0563	13					0.2128	0.2024	0.1834	13
		0.0586	0.0707	0.0691	13					0.2369	0.2002	0.1793	13
		0.0838	0.0797	0.0565	13					0.2951	0.2213	0.1587	13
		0.0824	0.0886	0.0646	13					0.2536	0.2234	0.1383	13
		0.0815	0.1049	0.0733	13					0.2654	0.1799	0.1704	13
		0.0859	0.0791	0.0689	13					0.2713	0.1989	0.1732	13
		0.0938	0.0781	0.0606	13					0.2336	0.1864	0.1795	13
		0.0995	0.0807	0.0563	13					0.2494	0.2152	0.133	13
		0.1047	0.092	0.0598	13					0.2547	0.2048	0.1821	13
		0.0865	0.0944	0.0551	13					0.2321	0.2467	0.1698	13
		0.092	0.0828	0.0575	13					0.2683	0.2438	0.1702	13
		0.0853	0.0711	0.0603	13					0.2325	0.2176	0.1414	13
		0.0814	0.0621	0.0605	13					0.258	0.2151	0.1526	13
		0.0906	0.0932	0.0602	13					0.2981	0.2415	0.1597	13
		0.0823	0.0843	0.0452	13					0.2491	0.2078	0.1805	13
		0.0885	0.088	0.0573	13					0.2767	0.183	0.1473	13
		0.0694	0.0719	0.0702	13					0.2771	0.2495	0.1443	13
		0.0875	0.0776	0.0713	13					0.2688	0.2088	0.1942	13
		0.082	0.0664	0.0552	13					0.2486	0.2175	0.1762	13
		0.0812	0.0842	0.0558	13					0.238	0.2384	0.142	13
		0.0901	0.071	0.0578	13					0.2425	0.1741	0.1712	13
		0.0802	0.0819	0.058	13					0.2367	0.2262	0.1552	13
		0.0815	0.082	0.0557	13					0.2512	0.2091	0.1619	13
		0.0885	0.081	0.0615	13					0.2695	0.21	0.1439	13
										0.173	0.1605	0.1601	14
										0.2356	0.1428	0.1674	14
										0.2199	0.1529	0.14	14
										0.2825	0.1623	0.1388	14
										0.2474	0.1567	0.1529	14
										0.2273	0.1553	0.16	14
										0.2389	0.1428	0.1375	14
										0.2323	0.1435	0.124	14
										0.2174	0.141	0.1359	14
										0.2474	0.1468	0.1262	14
										0.2767	0.1734	0.1367	14
										0.2408	0.1586	0.1121	14
										0.1535	0.143	0.131	14
										0.2088	0.1467	0.1294	14
										0.2169	0.1274	0.1651	14
										0.2406	0.15	0.1432	14
										0.1875	0.151	0.1502	14
										0.2099	0.1329	0.1325	14
										0.2013	0.1499	0.1417	14
										0.189	0.1313	0.158	14
										0.1762	0.1499	0.1102	14
										0.1857	0.1708	0.1302	14
										0.1887	0.1421	0.1433	14
										0.1813	0.1714	0.1498	14
										0.1734	0.1572	0.1345	14
										0.2263	0.1676	0.1419	14
										0.2204	0.1549	0.1594	14
										0.1945	0.1367	0.1495	14
										0.1873	0.1525	0.1473	14
										0.2338	0.1569	0.1351	14
										0.1826	0.127	0.1611	14
										0.2114	0.1786	0.1221	14
										0.1779	0.1637	0.1556	14
										0.2021	0.1533	0.145	14
										0.1809	0.124	0.1422	14
										0.1835	0.1607	0.1339	14
										0.156	0.1513	0.1411	14
										0.1783	0.1229	0.1377	14
										0.1866	0.1427	0.1271	14
										0.1857	0.1815	0.1363	14
										0.2049	0.1318	0.1232	15
										0.209	0.1586	0.1464	15
										0.1918	0.1674	0.1282	15
										0.2051	0.1823	0.1357	15
										0.205	0.1311	0.1185	15
										0.1878	0.1525	0.1171	15
										0.1923	0.1682	0.1366	15
										0.1798	0.1684	0.1629	15
										0.1643	0.1511	0.1388	15
										0.2313	0.1356	0.141	15
										0.1659	0.1361	0.1333	15
										0.1898	0.1443	0.1084	15
										0.1865	0.164	0.1203	15
										0.2103	0.1601	0.1364	15
										0.1884	0.1729	0.1386	15
										0.1773	0.1418	0.1453	15
										0.2571	0.147	0.1073	15
										0.1505	0.1342	0.1445	15
										0.167	0.1604	0.1328	15
										0.104	0.1287	0.1328	15
										0.2092	0.1525	0.1436	15
										0.1751	0.1699	0.1228	15
										0.1842	0.1839	0.1473	15
										0.1849	0.17	0.1426	15
										0.2082	0.1995	0.1465	15
										0.2339	0.166	0.1388	15
										0.1625	0.1325	0.1342	15
										0.1686	0.1715	0.1342	15
										0.1706	0.1676	0.131	15
										0.1953	0.1781	0.1395	15
										0.2107	0.1809	0.1357	15
										0.1943	0.1468	0.1265	15
										0.1526	0.1227	0.1671	15
										0.1736	0.1651	0.1244	15
										0.162	0.1546	0.146	15
										0.1762	0.1446	0.1344	15
										0.1926	0.1611	0.1242	15
										0.1955	0.1636	0.1164	15
										0.1953	0.1494	0.1039	15
										0.1634	0.1806	0.1461	15
										0.2731	0.114	0.1364	16
										0.2453	0.1556	0.126	16
										0.256	0.172	0.1497	16
										0.259	0.1736	0.1402	16
										0.2621	0.1645	0.1157	16
										0.2488	0.1684	0.114	16
										0.2937	0.1723	0.1221	16
										0.2489	0.1447	0.1012	16
										0.2742	0.1331	0.1274	16
										0.2604	0.1623	0.1198	16
										0.25	0.1451	0.1204	16
										0.2962	0.1313	0.1204	16
										0.2734	0.1445	0.1205	16
										0.2812	0.1565	0.1284	16
										0.3039	0.1382	0.1443	16
										0.3138	0.1573	0.1248	16
										0.2681	0.1358	0.1311	16
										0.2939	0.1637	0.1056	16
										0.2687	0.1427	0.1227	16
										0.2756	0.1444	0.1341	16
										0.2893	0.1701	0.1246	16
										0.3122	0.1639	0.1181	16
										0.2573	0.1393	0.108	16
										0.3038	0.1663	0.1522	16
										0.2832	0.13199	0.1256	16
										0.2514	0.1472	0.1301	16
										0.1061	0.14	0.1546	16
										0.1816	0.135	0.1253	16
										0.1594	0.1617	0.1132	16
										0.1705	0.1461	0.0993	16
										0.183	0.1585	0.1267	16
										0.1819	0.1682	0.1182	16
										0.1812	0.138	0.103	16
										0.2128	0.1493	0.1238	16
										0.2156	0.1631	0.1113	16
										0.1599	0.1624	0.1144	16
										0.2266	0.122	0.0841	16
										0.2336	0.165	0.1169	16
										0.1838	0.1795	0.1362	16
										0.1769	0.164	0.132	16
										0.134	0.1148	0.127	17
										0.1562	0.157	0.1334	17
										0.1585	0.1509	0.1145	17
										0.1264	0.1549	0.1044	17
										0.1542	0.1282	0.1237	17
										0.1774	0.1254	0.1291	17
										0.151	0.1445	0.1433	17
										0.1652	0.107	0.1201	17
										0.1647	0.0934	0.127	17
										0.1342	0.1702	0.1028	17
										0.1944	0.1572	0.0984	17
										0.1905	0.1241	0.1521	17
										0.1535	0.1496	0.1483	17
										0.202	0.164	0.1562	17
										0.1345	0.1816	0.1236	17
										0.1256	0.1294	0.1462	17
										0.1968	0.1473	0.1532	17
										0.1407	0.1564	0.1352	17
										0.1736	0.153	0.1401	17
										0.1751	0.17	0.1217	17
										0.1645	0.1573	0.1569	17
										0.2045	0.1377	0.1296	17
										0.1524	0.1727	0.168	17
										0.1449	0.1368	0.09	17
										0.1653	0.1742	0.111	17
										0.1741	0.136	0.1445	17
										0.1362	0.156	0.1047	17
										0.1747	0.1724	0.1446	17
										0.1766	0.1271	0.1139	17
										0.1154	0.1524	0.1205	17
										0.1781	0.1566	0.1284	17
										0.1428	0.1568	0.1361	17
										0.1706	0.1612	0.0964	17
										0.1366	0.118	0.1171	17
										0.1381	0.1506	0.1341	17
										0.1276	0.1498	0.1246	17
										0.1394	0.1534	0.1262	17
										0.1501	0.1411	0.1241	17
										0.1191	0.1194	0.1331	17
										0.1392	0.1388	0.1078	17
										0.1282	0.1226	0.1174	18
										0.1401	0.1282	0.1141	18
										0.1226	0.1144	0.1146	18
										0.1509	0.1063	0.0922	18
										0.1531	0.0896	0.095	18
										0.12	0.1161	0.099	18
										0.1592	0.119	0.0842	18
										0.1417	0.122	0.0821	18
										0.1563	0.1169	0.1091	18
										0.167	0.1223	0.0869	18
										0.144	0.1202	0.0878	18
										0.113	0.1234	0.1058	18
										0.1006	0.118	0.0905	18
										0.1408	0.0938	0.09004	18
										0.1261	0.093	0.1008	18
										0.109	0.1134	0.1043	18
										0.1139	0.1029	0.1154	18
										0.1339	0.107	0.1027	18
										0.1782	0.1039	0.0799	18
										0.1286	0.0982	0.1278	18
										0.0984	0.0952	0.08	18
										0.1178	0.0925	0.1172	18
										0.1297	0.1006	0.0978	18
										0.0786	0.1354	0.0995	18
										0.1169	0.0963	0.09	18
										0.1432	0.1131	0.0897	18
										0.0956	0.1064	0.1094	18
										0.1026	0.09	0.113	18
										0.1023	0.0935	0.084	18
										0.0775	0.1013	0.0839	18
										0.1253	0.0891	0.1041	18
										0.0876	0.0909	0.1078	18
										0.0842	0.1131	0.0866	18
										0.0993	0.1369	0.1038	18
										0.0886	0.1041	0.127	18
										0.0853	0.092	0.1106	18
										0.1032	0.0926	0.091	18
										0.1018	0.1053	0.0907	18
										0.1286	0.0911	0.1376	18
										0.0917	0.0914	0.1019	18
										0.138	0.0951	0.0684	19
										0.1263	0.0998	0.0668	19
										0.1471	0.0922	0.0907	19
										0.1162	0.093	0.0742	19
										0.1429	0.0623	0.0934	19
										0.1384	0.1035	0.0664	19
										0.1549	0.0854	0.0846	19
										0.1654	0.0991	0.0862	19
										0.1712	0.0812	0.0671	19
										0.203	0.0874	0.0646	19
										0.1299	0.1035	0.0605	19
										0.1365	0.0903	0.0724	19
										0.1416	0.0812	0.073	19
										0.1428	0.086	0.0552	19
										0.1811	0.0782	0.0663	19
										0.1931	0.0963	0.074	19
										0.1978	0.087	0.0895	19
										0.1519	0.0987	0.0958	19
										0.1459	0.0827	0.0666	19
										0.0844	0.0876	0.0674	19
										0.1354	0.0962	0.0839	19
										0.1509	0.0876	0.0944	19
										0.1762	0.078	0.0874	19
										0.1446	0.0928	0.0922	19
										0.1528	0.0996	0.0796	19
										0.1347	0.0939	0.0794	19
										0.1472	0.0852	0.0656	19
										0.1511	0.096	0.084	19
										0.1843	0.0971	0.0849	19
										0.1583	0.0909	0.0786	19
										0.1366	0.1028	0.0765	19
										0.175	0.0814	0.075	19
										0.1413	0.0724	0.0635	19
										0.1405	0.089	0.0779	19
										0.17	0.0933	0.0639	19
										0.1437	0.066	0.0644	19
										0.1857	0.0798	0.0749	19
										0.1659	0.1015	0.05	19
										0.1768	0.0918	0.0572	19
										0.1706	0.0988	0.0509	19
